# Supplementary material for: Upregulated ethanolamine phospholipid synthesis via selenoprotein I is required for effective metabolic reprogramming during T cell activation
Source: PubMed Central journal article supplement — Mol Metab. 2021 Jan 20;47:101170. doi: 10.1016/j.molmet.2021.101170 (PMC7881273; doi:10.1016/j.molmet.2021.101170), 2021-01-20

A

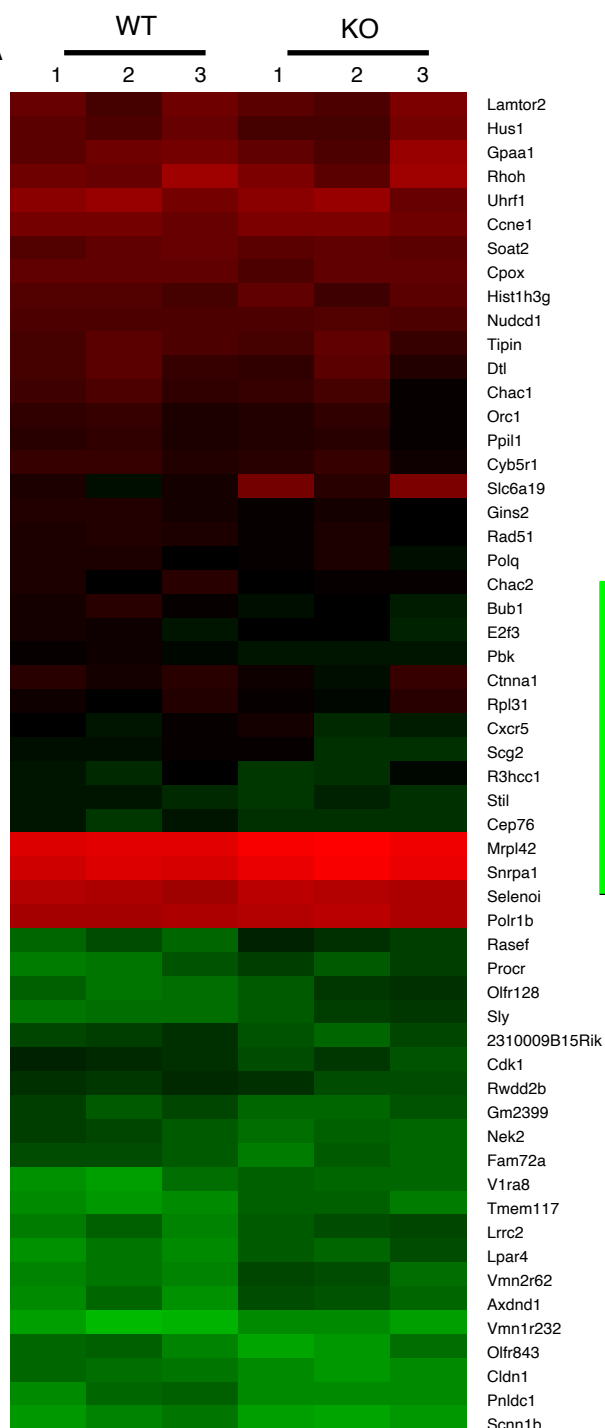

B

| Fold-Change | P-val  | Gene Symbol   | Description                                                                                   |
|-------------|--------|---------------|-----------------------------------------------------------------------------------------------|
| 3.6         | 0.0206 | Slc6a19       | solute carrier family 6 (neurotransmitter transporter), member 19                             |
| 2.82        | 0.0313 | Axdnd1        | axonemal dynein light chain domain containing 1                                               |
| 2.67        | 0.0303 | Rasef         | RAS and EF hand domain containing                                                             |
| 2.58        | 0.0264 | Olf1r128      | olfactory receptor 128                                                                        |
| 2.51        | 0.0336 | Vmn2r62       | vomeronasal 2, receptor 62                                                                    |
| 2.36        | 0.0069 | Sly           | Sycp3 like Y-linked                                                                           |
| 2.32        | 0.0423 | Lrrc2         | leucine rich repeat containing 2                                                              |
| 2.12        | 0.0115 | Vmn1r232      | vomeronasal 1 receptor 232                                                                    |
| 2.12        | 0.0277 | V1ra8         | vomeronasal 1 receptor, A8                                                                    |
| 2.05        | 0.0068 | Tmem117       | transmembrane protein 117                                                                     |
| 2.05        | 0.0462 | Procr         | protein C receptor, endothelial                                                               |
| 2.01        | 0.0109 | Lpar4         | lysophosphatidic acid receptor 4                                                              |
| -2.01       | 0.002  | Cldn1         | claudin 1                                                                                     |
| -2.02       | 0.0136 | Polr1b        | polymerase (RNA) I polypeptide B                                                              |
| -2.05       | 0.0095 | Gm2399        | predicted gene 2399 [Source:MGI Symbol;Acc:MGI:3780567]                                       |
| -2.05       | 0.0448 | R3hcc1        | R3H domain and coiled-coil containing 1                                                       |
| -2.06       | 0.01   | Hist1h3g      | histone cluster 1, H3g                                                                        |
| -2.1        | 0.0052 | 2310009B15Rik | RIKEN cDNA 2310009B15 gene                                                                    |
| -2.11       | 0.0221 | Ccne1         | cyclin E1                                                                                     |
| -2.12       | 0.007  | Nudcd1        | NudC domain containing 1                                                                      |
| -2.12       | 0.0165 | Cep76         | centrosomal protein 76                                                                        |
| -2.12       | 0.0265 | Rpl31         | ribosomal protein L31                                                                         |
| -2.12       | 0.0339 | Scn1b         | sodium channel, nonvoltage-gated 1 beta                                                       |
| -2.13       | 0.0266 | Rhoh          | ras homolog gene family, member H                                                             |
| -2.14       | 0.0144 | Ept1          | ethanolaminephosphotransferase 1 (CDP-ethanolamine-specific)                                  |
| -2.15       | 0.0133 | Fam72a        | family with sequence similarity 72, member A                                                  |
| -2.18       | 0.0044 | Rwdd2b        | RWD domain containing 2B                                                                      |
| -2.2        | 0.0426 | Mrpl42        | mitochondrial ribosomal protein L42                                                           |
| -2.24       | 0.0414 | Pnlcd1        | poly(A)-specific ribonuclease (PARN)-like domain containing 1                                 |
| -2.25       | 0.0029 | Cpox          | coproporphyrinogen oxidase                                                                    |
| -2.26       | 0.019  | Ctnna1        | catenin (cadherin associated protein), alpha 1                                                |
| -2.27       | 0.0104 | Hus1          | Hus1 homolog (S. pombe)                                                                       |
| -2.28       | 0.0189 | Stil          | Sci/Tal1 interrupting locus                                                                   |
| -2.28       | 0.0405 | Snrpa1        | small nuclear ribonucleoprotein polypeptide A; small nuclear ribonucleoprotein polypeptide A' |
| -2.31       | 0.0342 | Olf1r843      | olfactory receptor 843                                                                        |
| -2.33       | 0.0159 | Ppil1         | peptidylprolyl isomerase (cyclophilin)-like 1                                                 |
| -2.34       | 0.0025 | Soat2         | sterol O-acyltransferase 2                                                                    |
| -2.34       | 0.0207 | Orc1          | origin recognition complex, subunit 1                                                         |
| -2.39       | 0.0058 | Nek2          | NIMA (never in mitosis gene a)-related expressed kinase 2                                     |
| -2.4        | 0.0351 | E2f3          | E2F transcription factor 3                                                                    |
| -2.47       | 0.0223 | Tipin         | timeless interacting protein                                                                  |
| -2.47       | 0.0279 | Chac1         | ChaC, cation transport regulator 1                                                            |
| -2.5        | 0.0329 | Polq          | polymerase (DNA directed), theta                                                              |
| -2.56       | 0.0439 | Cxcr5         | chemokine (C-X-C motif) receptor 5                                                            |
| -2.58       | 0.028  | Cyb5r1        | cytochrome b5 reductase 1                                                                     |
| -2.6        | 0.0051 | Chac2         | ChaC, cation transport regulator 2                                                            |
| -2.69       | 0.0128 | Scg2          | secretogranin II                                                                              |
| -2.71       | 0.0436 | Dtl           | denticleless homolog (Drosophila)                                                             |
| -2.73       | 0.0283 | Lamtor2       | late endosomal/lysosomal adaptor, MAPK and MTOR activator 2                                   |
| -2.76       | 0.003  | Rad51         | RAD51 homolog                                                                                 |
| -2.77       | 0.0015 | Pbk           | PDZ binding kinase                                                                            |
| -2.83       | 0.0015 | Cdk1          | cyclin-dependent kinase 1                                                                     |
| -2.93       | 0.0314 | Gpaa1         | GPI anchor attachment protein 1                                                               |
| -2.99       | 0.0324 | Uhrf1         | ubiquitin-like, containing PHD and RING finger domains, 1                                     |
| -3.01       | 0.0025 | Bub1          | budding uninhibited by benzimidazoles 1 homolog (S. cerevisiae)                               |
| -3.02       | 0.0027 | Gins2         | GINS complex subunit 2 (Psf2 homolog)                                                         |

Figure S5

C

| Pathway                    | # Up DEGs ↑ | # Down DEGs ↓ | Significance                                                  | p-value |        |
|----------------------------|-------------|---------------|---------------------------------------------------------------|---------|--------|
| Purine metabolism          | 4           | 10            | Pde1b, Gucy2e, Gucy1b2, Pde5a                                 | 3.27    | 0.0005 |
| Cell cycle                 | 0           | 9             | Mcm6, Mcm5, Mcm4, Bub1b, Bub1, Ccne1, Ccnb1, E2f3, Plk1       | 2.92    | 0.0012 |
| Electron Transport Chain   | 0           | 8             | Atp5j2, Atp5o, Ndufs5, Atp5g1, Ndufab1, Ndufc2, Atp5d, Ndufb8 | 1.96    | 0.011  |
| DNA Replication            | 0           | 8             | Prim1, Mcm6, Mcm5, Mcm4, Mcm10, Rfc5, Rfc2, Pold2             | 4.64    | 2E-05  |
| Oxidative phosphorylation  | 0           | 7             | Atp5d, Atp5g1, Atp5j2, Atp5o, Ndufb8, Ndufs5, Ndufc2          | 2.85    | 0.0014 |
| G1 to S cell cycle control | 0           | 6             | E2f3, Ccne1, Mcm4, Mcm5, Mcm6, Prim1                          | 2       | 0.01   |

D

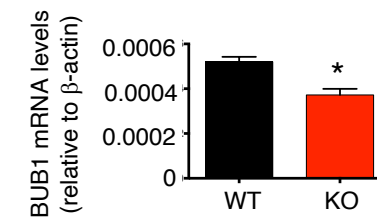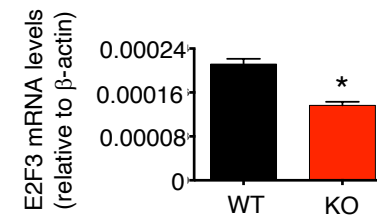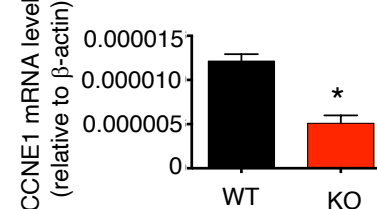

Supplement: mmc5.pdf [file mmc5.pdf]
