# Supplementary material for: Upregulated ethanolamine phospholipid synthesis via selenoprotein I is required for effective metabolic reprogramming during T cell activation
Source: PubMed Central journal article supplement — Mol Metab. 2021 Jan 20;47:101170. doi: 10.1016/j.molmet.2021.101170 (PMC7881273; doi:10.1016/j.molmet.2021.101170), 2021-01-20
Supplement: mmc6.pdf [file mmc6.pdf]

**Table S1.** Heat map of statistically significant biochemicals profiled in this study. **Red** and **green** shaded cells indicate p<0.05 (**red** indicates that the mean values are significantly higher for that comparison; **green** values significantly lower). **Light red** and **light green** shaded cells indicate 0.05<p<0.10 (**light red** indicates that the mean values trend higher for that comparison; **light green** values trend lower).

| Sub Pathway                               | Biochemical Name                | Platform        | Comp ID | KEGG                   | HMDB                        | PUBCHEM       |
|-------------------------------------------|---------------------------------|-----------------|---------|------------------------|-----------------------------|---------------|
| Glycine, Serine and Threonine Metabolism  | glycine                         | LC/MS pos early | 58      | <a href="#">C00037</a> | <a href="#">HMDB0000123</a> | 750           |
|                                           | dimethylglycine                 | LC/MS pos early | 5086    | <a href="#">C03626</a> | <a href="#">HMDB0000092</a> | 673           |
|                                           | betaine                         | LC/MS pos early | 3141    | <a href="#">C00719</a> | <a href="#">HMDB0000043</a> | 247           |
|                                           | serine                          | LC/MS pos early | 1648    | <a href="#">C00065</a> | <a href="#">HMDB0000187</a> | 5951          |
|                                           | N-acetyls erine                 | LC/MS pos early | 37076   |                        | <a href="#">HMDB0002931</a> | 65249         |
|                                           | threonine                       | LC/MS pos early | 1284    | <a href="#">C00188</a> | <a href="#">HMDB0000167</a> | 6288          |
|                                           | N-acetylthreonine               | LC/MS polar     | 33939   |                        | <a href="#">HMDB0062557</a> | 152204        |
| Alanine and Aspartate Metabolism          | alanine                         | LC/MS pos early | 1126    | <a href="#">C00041</a> | <a href="#">HMDB0000161</a> | 5950          |
|                                           | N-acetylanaline                 | LC/MS neg       | 1585    | <a href="#">C02847</a> | <a href="#">HMDB0000766</a> | 88064         |
|                                           | aspartate                       | LC/MS pos early | 443     | <a href="#">C00049</a> | <a href="#">HMDB0000191</a> | 5960          |
|                                           | N-acetylaspartate (NAA)         | LC/MS polar     | 22185   | <a href="#">C01042</a> | <a href="#">HMDB0000812</a> | 65065         |
|                                           | asparagine                      | LC/MS pos early | 512     | <a href="#">C00152</a> | <a href="#">HMDB0000168</a> | 6267          |
|                                           | N-acetylasparagine              | LC/MS pos early | 33942   |                        | <a href="#">HMDB0006028</a> | 99715         |
|                                           | glutamate                       | LC/MS pos early | 57      | C00025 C00217          | <a href="#">HMDB0000148</a> | 33032         |
| Glutamate Metabolism                      | glutamine                       | LC/MS neg       | 53      | <a href="#">C00064</a> | <a href="#">HMDB0000641</a> | 5961          |
|                                           | N-acetylglutamate               | LC/MS pos early | 15720   | <a href="#">C00624</a> | <a href="#">HMDB0001138</a> | 70914         |
|                                           | N-acetylglutamine               | LC/MS pos early | 33943   | <a href="#">C02716</a> | <a href="#">HMDB0006029</a> | 182230        |
|                                           | glutamate, gamma-methyl ester   | LC/MS pos early | 33487   |                        | <a href="#">HMDB0061715</a> | 68662         |
|                                           | histidine                       | LC/MS neg       | 59      | <a href="#">C00135</a> | <a href="#">HMDB0000177</a> | 6274          |
| Histidine Metabolism                      | 1-methylhistidine               | LC/MS pos early | 30460   | <a href="#">C01152</a> | <a href="#">HMDB0000001</a> | 92105         |
|                                           | trans-urocanate                 | LC/MS polar     | 607     | <a href="#">C00785</a> | <a href="#">HMDB0000301</a> | 736715        |
|                                           | carosine                        | LC/MS pos early | 1768    | <a href="#">C00386</a> | <a href="#">HMDB0000033</a> | 439224        |
|                                           | 4-imidazoleacetate              | LC/MS pos early | 32349   | <a href="#">C02835</a> | <a href="#">HMDB0002024</a> | 96215         |
|                                           | lysine                          | LC/MS polar     | 1301    | C00047 C00739          | <a href="#">HMDB0003405</a> | 5962          |
| Lysine Metabolism                         | N6-methyllysine                 | LC/MS pos early | 62860   | <a href="#">C02728</a> | <a href="#">HMDB0002038</a> | 164795        |
|                                           | N6,N6-trimethyllysine           | LC/MS pos early | 1498    | <a href="#">C03793</a> | <a href="#">HMDB0001325</a> | 440120        |
|                                           | N,N,N-trimethyl-5-aminovaleate  | LC/MS pos early | 57687   |                        |                             | 14274897      |
|                                           | phenylalanine                   | LC/MS pos early | 64      | <a href="#">C00079</a> | <a href="#">HMDB0000159</a> | 6140          |
| Phenylalanine Metabolism                  | tyrosine                        | LC/MS pos early | 1299    | <a href="#">C00082</a> | <a href="#">HMDB0000158</a> | 6057          |
|                                           | 4-hydroxyphenylpyruvate         | LC/MS neg       | 1669    | <a href="#">C01179</a> | <a href="#">HMDB0000707</a> | 979           |
|                                           | 3-(4-hydroxyphenyl)lactate      | LC/MS neg       | 32197   | <a href="#">C03672</a> | <a href="#">HMDB0000755</a> | 9378          |
| Tyrosine Metabolism                       | tryptophan                      | LC/MS pos early | 54      | <a href="#">C00078</a> | <a href="#">HMDB0000929</a> | 6305          |
|                                           | kynurenine                      | LC/MS pos early | 15140   | <a href="#">C00328</a> | <a href="#">HMDB0000684</a> | 161166        |
|                                           | serotonin                       | LC/MS pos early | 2342    | <a href="#">C00780</a> | <a href="#">HMDB0000259</a> | 5202          |
|                                           | indolactate                     | LC/MS neg       | 18349   | <a href="#">C02043</a> | <a href="#">HMDB0000671</a> | 92904         |
| Leucine, Isoleucine and Valine Metabolism | leucine                         | LC/MS pos early | 60      | <a href="#">C00123</a> | <a href="#">HMDB0000687</a> | 6106          |
|                                           | 4-methyl-2-oxopentanoate        | LC/MS neg       | 22116   | <a href="#">C00233</a> | <a href="#">HMDB0000695</a> | 70            |
|                                           | beta-hydroxyisovalerylcarbitine | LC/MS pos early | 35433   |                        |                             |               |
|                                           | 3-methylglutaconate             | LC/MS polar     | 57747   |                        | <a href="#">HMDB0000522</a> | 1551553       |
|                                           | isoleucine                      | LC/MS pos early | 1125    | C16424 C00407 C06418   | <a href="#">HMDB0000172</a> | 6306          |
|                                           | 3-methyl-2-oxovalerate          | LC/MS neg       | 15676   | C00671 C06008 C03465   | <a href="#">HMDB0000491</a> | 440877,439286 |
|                                           | 2-methylbutyrylcarnitine (C5)   | LC/MS pos early | 45095   |                        | <a href="#">HMDB0000378</a> | 6426901       |
|                                           | ethylmalonate                   | LC/MS polar     | 15765   |                        | <a href="#">HMDB0000622</a> | 11756         |
|                                           | methylsuccinate                 | LC/MS polar     | 15745   |                        | <a href="#">HMDB0001844</a> | 10349         |
|                                           | valine                          | LC/MS pos early | 1649    | <a href="#">C00183</a> | <a href="#">HMDB0000883</a> | 6287          |
| Methionine, Cysteine, SAM and Taurine     | methionine                      | LC/MS polar     | 1302    | <a href="#">C00073</a> | <a href="#">HMDB0000696</a> | 6137          |
|                                           | N-acetylmethionine              | LC/MS neg       | 1589    | <a href="#">C02712</a> | <a href="#">HMDB0011745</a> | 448580        |
|                                           | N-formylmethionine              | LC/MS neg       | 2829    | <a href="#">C03145</a> | <a href="#">HMDB0001015</a> | 439750        |
|                                           | methionine sulfone              | LC/MS pos early | 44878   |                        | <a href="#">HMDB0062174</a> | 69961         |
|                                           | methionine sulfoxide            | LC/MS pos early | 18374   | <a href="#">C02989</a> | <a href="#">HMDB0002005</a> | 158980        |
|                                           | S-adenosylmethionine (SAM)      | LC/MS pos early | 15915   | <a href="#">C00019</a> | <a href="#">HMDB0001185</a> | 34755         |
|                                           | S-adenosylhomocysteine (SAH)    | LC/MS neg       | 42382   | <a href="#">C00021</a> | <a href="#">HMDB000939</a>  | 439155        |
|                                           | homocysteine                    | LC/MS pos early | 15128   | <a href="#">C00155</a> | <a href="#">HMDB0000742</a> | 778           |
|                                           | cysteine                        | LC/MS pos early | 1868    | <a href="#">C00097</a> | <a href="#">HMDB0000574</a> | 5862          |
|                                           | N-acetylcysteine                | LC/MS neg       | 1586    | <a href="#">C06809</a> | <a href="#">HMDB0001890</a> | 12035         |
|                                           | hypotaurine                     | LC/MS pos early | 590     | <a href="#">C00519</a> | <a href="#">HMDB0000965</a> | 107812        |
|                                           | taurine                         | LC/MS neg       | 2125    | <a href="#">C00245</a> | <a href="#">HMDB0000251</a> | 1123          |
|                                           | N-acetyltaurine                 | LC/MS polar     | 48187   |                        | <a href="#">HMDB0240253</a> | 159864        |
|                                           | 3-sulfo-L-alanine               | LC/MS polar     | 47069   | <a href="#">C00506</a> | <a href="#">HMDB0002757</a> | 72886         |

| Fold of Change             | Statistical Values         |         |
|----------------------------|----------------------------|---------|
| Welch's t-Test             | Welch's t-Test             |         |
| KO T- cells<br>WT T- cells | KO T- cells<br>WT T- cells |         |
|                            | p-value                    | q-value |
| 1.08                       | 0.4854                     | 0.9839  |
| 1.02                       | 0.9367                     | 0.9839  |
| 1.18                       | 0.1879                     | 0.8181  |
| 1.12                       | 0.3168                     | 0.9577  |
| 1.07                       | 0.5316                     | 0.9839  |
| 1.06                       | 0.5434                     | 0.9839  |
| 1.04                       | 0.6466                     | 0.9839  |
| 1.12                       | 0.2743                     | 0.9238  |
| 0.92                       | 0.6176                     | 0.9839  |
| 1.03                       | 0.6805                     | 0.9839  |
| 1.04                       | 0.6510                     | 0.9839  |
| 1.12                       | 0.3780                     | 0.9839  |
| 1.00                       | 0.9101                     | 0.9839  |
| 1.06                       | 0.5594                     | 0.9839  |
| 1.36                       | 0.0268                     | 0.4501  |
| 1.75                       | 0.0001                     | 0.0096  |
| 1.04                       | 0.6384                     | 0.9839  |
| 1.45                       | 0.4104                     | 0.9839  |
| 0.84                       | 0.2758                     | 0.9238  |
| 1.17                       | 0.6963                     | 0.9839  |
| 0.56                       | 0.8791                     | 0.9839  |
| 0.89                       | 0.4171                     | 0.9839  |
| 0.72                       | 0.1678                     | 0.7798  |
| 1.01                       | 0.8846                     | 0.9839  |
| 0.97                       | 0.7626                     | 0.9839  |
| 0.99                       | 0.8693                     | 0.9839  |
| 1.65                       | 0.0005                     | 0.0364  |
| 1.00                       | 0.8767                     | 0.9839  |
| 1.00                       | 0.9687                     | 0.9846  |
| 0.71                       | 0.3043                     | 0.9370  |
| 0.77                       | 0.0678                     | 0.6199  |
| 0.97                       | 0.9229                     | 0.9839  |
| 1.09                       | 0.5030                     | 0.9839  |
| 0.73                       | 0.0556                     | 0.6094  |
| 0.71                       | 0.0605                     | 0.6094  |
| 0.92                       | 0.6367                     | 0.9839  |
| 0.96                       | 0.9153                     | 0.9839  |
| 0.97                       | 0.9870                     | 0.9971  |
| 0.76                       | 0.1403                     | 0.7748  |
| 0.86                       | 0.2771                     | 0.9238  |
| 0.67                       | 0.2924                     | 0.9370  |
| 0.93                       | 0.9068                     | 0.9839  |
| 0.95                       | 0.9399                     | 0.9839  |
| 0.94                       | 0.8682                     | 0.9839  |
| 0.92                       | 0.5729                     | 0.9839  |
| 0.99                       | 0.9434                     | 0.9839  |
| 1.28                       | 0.0696                     | 0.6199  |
| 0.83                       | 0.1656                     | 0.7798  |
| 0.93                       | 0.6638                     | 0.9839  |
| 0.89                       | 0.4462                     | 0.9839  |
| 1.15                       | 0.1996                     | 0.8265  |
| 1.12                       | 0.3748                     | 0.9839  |
| 1.08                       | 0.8831                     | 0.9839  |
| 1.00                       | 0.8696                     | 0.9839  |
| 0.63                       | 0.0432                     | 0.5700  |
| 1.29                       | 0.0562                     | 0.6094  |
| 1.19                       | 0.1597                     | 0.7798  |
| 0.82                       | 0.1642                     | 0.7798  |
| 1.06                       | 0.9616                     | 0.9839  |

| Chemical ID | CAS                              | RI     | Mass      |
|-------------|----------------------------------|--------|-----------|
| 340         | 56-40-6                          | 1375   | 76.03931  |
| 806         | 1118-68-9                        | 1104   | 104.07061 |
| 799         | 107-43-7                         | 1064   | 118.08626 |
| 503         | 56-45-1                          | 1239   | 106.04987 |
| 100001851   | 97-14-3                          | 800    | 148.06044 |
| 564         | 72-19-5                          | 1514   | 120.06552 |
| 100001274   | 17093-74-2                       | 1700   | 160.06153 |
| 811         | 56-41-7                          | 1700   | 90.05496  |
| 1110        | 97-69-8                          | 861    | 130.05096 |
| 234         | 56-84-8                          | 1165   | 134.04479 |
| 100000787   | 997-55-7,997-55-7                | 3143   | 174.04079 |
| 917         | 70-47-3                          | 1225   | 133.06077 |
| 100001257   | 4033-40-3                        | 785    | 175.07134 |
| 561         | 56-86-0                          | 1500   | 148.06044 |
| 563         | 56-85-9                          | 692    | 145.06186 |
| 100000282   | 83717                            | 1050   | 190.071   |
| 100001253   | 2490-97-3                        | 845    | 189.08699 |
| 100001103   | 1499-55-4,1499-55-4              | 2170   | 162.07609 |
| 355         | 5934-29-2                        | 755.9  | 154.0622  |
| 100001051   | 332-80-9                         | 2755   | 170.09241 |
| 537         | 104-98-3                         | 1882.5 | 137.03565 |
| 249         | 305-84-0                         | 2942   | 227.11387 |
| 100001207   | 645-65-8                         | 2055   | 127.05021 |
| 407         | 56-87-1                          | 5431.1 | 145.09825 |
| 100003415   | 1188-07-4                        | 2831   | 161.12846 |
| 189         | 23284-33-5                       | 2825   | 189.15976 |
| 100015962   |                                  | 2186   | 160.13321 |
| 460         | 63-91-2                          | 2878   | 166.08626 |
| 815         | 60-18-4                          | 2430   | 182.08117 |
| 1141        | 156-39-8                         | 1690   | 179.03498 |
| 240         | 6482-98-0                        | 1379   | 181.05063 |
| 565         | 73-22-3                          | 2996   | 205.09716 |
| 100000265   | 2922-83-0                        | 2739   | 209.09207 |
| 504         | 153-98-0                         | 2550   | 177.10224 |
| 100000463   | 832-97-3                         | 2286   | 204.06661 |
| 397         | 61-90-5                          | 2864   | 132.10191 |
| 100000551   | 816-66-0                         | 2170   | 129.05571 |
| 100001594   | 99159-87-2                       | 2584   | 262.1649  |
| 100002458   | 5746-90-7                        | 2700   | 99.04518  |
| 376         | 73-32-5                          | 2800   | 132.10191 |
| 100000036   | 1460-34-0,51829-07-3             | 2064.2 | 129.05572 |
| 100001509   | 31023-25-3                       | 3050   | 246.16999 |
| 2054        | 601-75-2                         | 2785   | 131.03498 |
| 2051        | 498-21-5                         | 2800   | 131.03498 |
| 566         | 72-18-4                          | 2479   | 118.08626 |
| 415         | 63-68-3                          | 1871.8 | 148.04377 |
| 1083        | 65-82-7                          | 1787   | 190.05434 |
| 194         | 4289-98-9                        | 1543.8 | 176.03869 |
| 100004635   | 820-10-0                         | 1250   | 182.04816 |
| 100000039   | 3226-65-1                        | 1272   | 166.05325 |
| 1263        | 24346-00-7,86867-01-8,86867-01-8 | 3002   | 399.14452 |
| 197         | 979-92-0                         | 1832.4 | 383.11431 |
| 311         | 454-29-5                         | 2155   | 136.04268 |
| 800         | 52-90-4,56-89-3                  | 1475   | 122.02703 |
| 1107        | 616-91-1                         | 1108   | 162.02304 |
| 358         | 300-84-5                         | 724    | 110.02703 |
| 512         | 107-35-7                         | 690    | 124.00739 |
| 100005466   |                                  | 1249   | 166.01795 |
| 382         | 498-40-8                         | 2890   | 167.96722 |

|                                        |                                               |                           |                 |                         |                       |                          |       |        |        |           |                                  |                     |           |           |
|----------------------------------------|-----------------------------------------------|---------------------------|-----------------|-------------------------|-----------------------|--------------------------|-------|--------|--------|-----------|----------------------------------|---------------------|-----------|-----------|
| Urea cycle; Arginine and Proline Metab | arginine                                      | LC/MS pos early           | 1638            | C00062                  | HMD80000517           | 6322                     | 0.97  | 0.7888 | 0.9839 | 231       | 1119-34-2                        | 2825                | 175.11896 |           |
|                                        | argininosuccinate                             | LC/MS pos early           | 1547            | C03406                  | HMD80000052           | 60150382                 | 1.21  | 0.2832 | 0.9272 | 232       | 156637-58-0                      | 2745                | 291.12992 |           |
|                                        | ornithine                                     | LC/MS pos early           | 1493            | C00077                  | HMD80000214           | 6282                     | 1.27  | 0.0751 | 0.6315 | 444       | 3184-13-2                        | 2800                | 133.09716 |           |
|                                        | 2-oxoarginine*                                | LC/MS pos early           | 55072           | C03773                  | HMD80004225           | 558                      | 0.60  | 0.0107 | 0.3044 | 100002784 | 104175                           | 1780                | 174.08732 |           |
|                                        | citrulline                                    | LC/MS pos early           | 2132            | C00327                  | HMD80000904           | 9750                     | 1.15  | 0.7397 | 0.9839 | 391       | 372-75-8                         | 1520                | 176.10297 |           |
|                                        | homocystine                                   | LC/MS pos early           | 22137           | C01924                  | HMD80000670           | 9085                     | 0.91  | 0.5501 | 0.9839 | 100000961 | 156-86-5                         | 2882                | 189.13461 |           |
|                                        | proline                                       | LC/MS pos early           | 1998            | C00148 C000763          | MDB0000162 HMD8000034 | 145742;614;8989          | 1.21  | 0.1529 | 0.7748 | 490       | 147-85-3                         | 1603                | 116.07061 |           |
|                                        | dimethylarginine (SDMA + ADMA)                | LC/MS pos early           | 36808           | C21189 C03626           | MDB0003334 HMD8000019 | 123831;169148            | 1.44  | 0.0189 | 0.3594 | 100001810 | 102783-24-4                      | 2850                | 203.15026 |           |
|                                        | N-acetylarginine                              | LC/MS pos early           | 33953           | C02562                  | HMD80004620           | 67427                    | 1.05  | 0.6529 | 0.9839 | 100001266 | 155-84-0                         | 2245                | 217.12952 |           |
|                                        | N-delta-acetylornithine                       | LC/MS neg                 | 43249           | C00437                  | HMD80003357           | 9620500                  | 0.79  | 0.0901 | 0.6802 | 100004523 |                                  | 858                 | 173.09316 |           |
|                                        | trans-4-hydroxyproline                        | LC/MS pos early           | 32306           | C01157                  | HMD80000725           | 5810                     | 1.09  | 0.4416 | 0.9839 | 1001      | 51-35-4                          | 1064                | 132.06552 |           |
|                                        | pro-hydroxy-pro                               | LC/MS pos early           | 35127           |                         | HMD80005695           | 11902893                 | 0.82  | 0.4355 | 0.9839 | 100001167 | 18884-24-7                       | 2128                | 229.11829 |           |
|                                        | N-methylproline                               | LC/MS pos early           | 37431           |                         | HMD80094696           | 643474                   | 0.92  | 0.6818 | 0.9839 | 100001956 | 475-11-6                         | 1335                | 130.08626 |           |
|                                        | N,N,N-trimethyl-L-arginine betaine (TMAP)     | LC/MS pos early           | 62947           |                         | HMD80240365           |                          | 1.58  | 0.1373 | 0.7898 | 100020217 |                                  | 2470                | 229.15467 |           |
| Creatine Metabolism                    | guanidinoacetate                              | LC/MS pos early           | 43802           | C00581                  | HMD80000128           | 763                      | 4.29  | 0.0000 | 0.0053 | 344       | 352-97-6                         | 1937                | 118.06111 |           |
|                                        | creatine                                      | LC/MS pos early           | 27718           | C00300                  | HMD80000064           | 586                      | 1.12  | 0.3352 | 0.9779 | 1221      | 57-00-1                          | 1947                | 132.07676 |           |
|                                        | creatinine                                    | LC/MS pos early           | 513             | C00791                  | HMD80000562           | 598                      | 0.92  | 0.8065 | 0.9839 | 275       | 60-27-5                          | 2055                | 114.06919 |           |
|                                        | creatine phosphate                            | LC/MS polar               | 33951           | C02305                  | HMD80001511           | 587;9548602              | 0.71  | 0.0749 | 0.6315 | 100000112 | 922-32-7                         | 3831                | 210.02853 |           |
|                                        | putrescine                                    | LC/MS pos early           | 1408            | C00134                  | HMD80001414           | 1045                     | 1.19  | 0.3864 | 0.9839 | 49        | 110-60-1                         | 3027                | 89.10733  |           |
| Polyamine Metabolism                   | spermidine                                    | LC/MS pos early           | 485             | C00315                  | HMD80001257           | 1102                     | 0.87  | 0.4922 | 0.9839 | 50        | 124-20-9                         | 3355                | 146.16518 |           |
|                                        | (N(1) + N(8))-acetylspermidine                | LC/MS pos early           | 57814           | C00612 C01029           | MDB0001276 HMD8000021 | 123889;496               | 1.03  | 0.9020 | 0.9839 | 100016038 |                                  | 3080                | 188.17574 |           |
|                                        | spermine                                      | LC/MS pos late            | 603             | C00750                  | HMD80001256           | 1103                     | 1.20  | 0.8006 | 0.9839 | 507       | 71-44-3                          | 758                 | 203.22303 |           |
|                                        | 5-methylthioadenosine (MTA)                   | LC/MS pos early           | 1419            | C00170                  | HMD80001173           | 439176                   | 0.95  | 0.7465 | 0.9839 | 212       | 2457-80-9                        | 2752                | 298.09884 |           |
|                                        | 4-guanidinobutanoate                          | LC/MS pos early           | 15681           | C01035                  | HMD80003464           | 500                      | 2.04  | 0.0001 | 0.0096 | 100000096 | 463-003;463-00-3                 | 2320                | 146.09241 |           |
| Guandinio and Acetamido Metabolism     | glutathione, reduced (GSH)                    | LC/MS neg                 | 2127            | D00014 C00051           | HMD80000125           | 124886                   | 1.25  | 0.2331 | 0.8713 | 496       | 70-18-8                          | 790                 | 306.07653 |           |
|                                        | glutathione, oxidized (GSSG)                  | LC/MS pos early           | 27727           | D00031 C00127           | HMD80003337           | 65359                    | 1.00  | 0.8638 | 0.9839 | 448       | 103239-24-3                      | 2667                | 613.15925 |           |
|                                        | S-lactylglutathione                           | LC/MS pos early           | 19731           | C03451                  | HMD80001066           | 440018                   | 0.92  | 0.7786 | 0.9839 | 1343      | 54398-03-7                       | 2124                | 380.11222 |           |
|                                        | cysteinylglycine                              | LC/MS pos early           | 35637           | C01419                  | HMD80000078           | 439498                   | 1.16  | 0.1517 | 0.7748 | 278       | 19246-18-5                       | 2132                | 179.0485  |           |
|                                        | 5-oxoproline                                  | LC/MS neg                 | 1494            | C01879 C02237           | HMD80000267           | 439685;7405              | 0.94  | 0.6851 | 0.9839 | 1021      | 98-79-3                          | 738.5               | 128.03531 |           |
|                                        | ophthalmate                                   | LC/MS pos early           | 34592           |                         | HMD800005765          | 7018721                  | 1.38  | 0.0320 | 0.4934 | 100001311 | 495-27-2                         | 2085                | 290.13467 |           |
|                                        | S-(1,2-dicarboxyethyl)glutathione             | LC/MS neg                 | 63009           |                         |                       | 9802383                  | 1.32  | 0.1330 | 0.7898 | 100020967 | 1115-52-2                        | 543                 | 422.08748 |           |
|                                        | Co-A-glutathione*                             | LC/MS neg                 | 62804           | C00920                  |                       | 46873828                 | 1.03  | 0.5385 | 0.9839 | 289       | 6477-52-7                        | 1326                | 535.0944  |           |
| Gamma-glutamyl Amino Acid              | gamma-glutamylcysteine                        | LC/MS pos early           | 1778            | C00669                  | HMD80001049           | 123938                   | 1.84  | 0.0025 | 0.1178 | 1036      | 636-58-8                         | 2118                | 251.06963 |           |
|                                        | gamma-glutamylglutamate                       | LC/MS pos early           | 36738           | C05282                  | HMD80011737           | 92865                    | 1.06  | 0.7298 | 0.9839 | 331       | 1116-22-9                        | 1775                | 277.10303 |           |
|                                        | gamma-glutamylglycine                         | LC/MS pos early           | 33949           |                         | HMD80011667           | 100099                   | 0.91  | 0.6323 | 0.9839 | 100001294 | 1948-29-9                        | 1535                | 205.0819  |           |
| Acetylated Peptides                    | phenylacetyl-glycine                          | LC/MS neg                 | 33945           | C05598                  | HMD80000821           | 68144                    | 0.90  | 0.3542 | 0.9779 | 100001275 | 500-98-1                         | 2375                | 192.06661 |           |
|                                        | Modified Peptides                             | LC/MS pos early           | 64571           |                         |                       |                          | 0.98  | 0.9438 | 0.9839 | 100022041 |                                  | 2500                | 241.15467 |           |
| Glycolysis, Gluconogenesis, and Pyru   | glucose                                       | LC/MS polar               | 20468           | C00031                  | HMD80000122           | 5793                     | 0.90  | 0.8817 | 0.9839 | 572       | 50-99-7                          | 2342                | 179.05511 |           |
|                                        | fructose 1,6-diphosphate/glucose 1,6-diphosph | LC/MS neg                 | 46896           | C05378 C00354 C01231    | MDB0003514 HMD8000010 | 588350;124383956;445374  | 0.55  | 0.0013 | 0.0699 | 100002180 |                                  | 551                 | 338.98897 |           |
|                                        | dihydroxyacetone phosphate (DHAP)             | LC/MS neg                 | 15522           | C00111                  | HMD800001473          | 668                      | 0.83  | 0.0982 | 0.7154 | 309       | 102783-56-2                      | 603                 | 168.99075 |           |
|                                        | 3-phosphoglycerate                            | LC/MS neg                 | 1414            | C00597                  | HMD80000807           | 724                      | 0.69  | 0.1294 | 0.7898 | 132       | 80731-10-8                       | 583                 | 184.98566 |           |
|                                        | phosphoenolpyruvate (PEP)                     | LC/MS neg                 | 597             | C00074                  | HMD80000263           | 1005                     | 0.98  | 0.0838 | 0.6684 | 463       | 10526-80-4                       | 587.3               | 166.97511 |           |
|                                        | pyruvate                                      | LC/MS polar               | 48990           | C00022                  | HMD80000243           | 1080                     | 1.11  | 0.4357 | 0.9839 | 823       | 127-17-3                         | 1083                | 87.00877  |           |
|                                        | lactate                                       | LC/MS polar               | 527             | C00186                  | HMD80000190           | 612                      | 1.00  | 0.8470 | 0.9839 | 482       | 79-33-4                          | 1469                | 89.02442  |           |
|                                        | glycerate                                     | LC/MS polar               | 1572            | C00258                  | MDB0006372 HMD8000001 | 752;439194               | 0.92  | 0.5093 | 0.9839 | 1052      | 600-19-1                         | 2070.4              | 105.01933 |           |
|                                        | Pentose Phosphate Pathway                     | 6-phosphogluconate        | LC/MS neg       | 15442                   | C00345                | HMD80001316              | 91493 | 0.66   | 0.0704 | 0.6199    | 100000341                        | 921-62-0;53411-70-4 | 583.9     | 275.01735 |
|                                        |                                               | sedoheptulose-7-phosphate | LC/MS pos early | 35649                   | C05382                | HMD80001068              | 616   | 1.97   | 0.0206 | 0.3638    | 100001628                        | 2846-35-7           | 540       | 273.037   |
| ribose                                 |                                               | LC/MS polar               | 1471            | C00121                  | HMD80000283           | 5779                     | 1.64  | 0.0111 | 0.3044 | 914       | 50-69-1                          | 1508.2              | 195.05103 |           |
| Pentose Metabolism                     | ribitol                                       | LC/MS polar               | 15772           | 8532 C01904 C00474 C000 | MDB0000508 HMD8000018 | 6912                     | 0.97  | 0.9147 | 0.9839 | 100000406 | 488-81-3                         | 1789.6              | 151.06119 |           |
|                                        | ribonate                                      | LC/MS polar               | 27731           | C01685                  | HMD80000867           | 5460677                  | 0.98  | 0.7538 | 0.9839 | 100001007 | 8/3/36                           | 2425                | 165.04046 |           |
|                                        | arabitol/xylitol                              | LC/MS polar               | 48885           | C00542 C01904 C00379    | 2917 HMD80001851 HMD  | 6912;94154               | 0.88  | 0.1606 | 0.7798 | 100006430 |                                  | 1932.4              | 151.0612  |           |
|                                        | arabonate/xylonate                            | LC/MS polar               | 48255           | C00502 C05411           | HMD80000539           | 122045;6602431           | 0.98  | 0.8299 | 0.9839 | 100006115 |                                  | 2700                | 165.04046 |           |
|                                        | lyxonate                                      | LC/MS polar               | 61858           |                         |                       |                          | 0.88  | 0.4454 | 0.9839 | 100019968 |                                  | 2350                | 165.04046 |           |
|                                        | fructose                                      | LC/MS polar               | 577             | C00095                  | HMD80000660           | 2723872                  | 0.81  | 0.1798 | 0.7919 | 878       | 57-48-7                          | 2065                | 179.05511 |           |
| Fructose, Mannose and Galactose Meta   | mannitol/sorbitol                             | LC/MS polar               | 46142           | C00392 C00794           | MDB0000247 HMD8000007 | 6251;5780                | 0.96  | 0.8621 | 0.9839 | 100001740 |                                  | 2320                | 181.07176 |           |
|                                        | galactonate                                   | LC/MS polar               | 27719           | C15930 C00880           | HMD80000565           | 12310779;128869          | 1.28  | 0.1491 | 0.7748 | 100001026 | 299-28-5                         | 3085                | 195.05102 |           |
| Nucleotide Sugar                       | UDP-glucose                                   | LC/MS polar               | 32344           | C00029                  | HMD80000286           | 8629                     | 0.99  | 0.9890 | 0.9971 | 1096      | 117756-22-6                      | 3950                | 565.04775 |           |
|                                        | UDP-galactose                                 | LC/MS polar               | 15860           | C00052                  | HMD80000302           | 18068                    | 0.95  | 0.8621 | 0.9839 | 100000298 | 2956-16-3;91183-98-1;137869-52-1 | 4000                | 565.04774 |           |
|                                        | UDP-gucuronate                                | LC/MS neg                 | 2763            | C00167                  | HMD80000935           | 17473                    | 0.93  | 0.7788 | 0.9839 | 1097      | 28053-08-9;63700-19-6            | 588                 | 579.02701 |           |
|                                        | UDP-N-acetylglucosamine/galactosamine         | LC/MS polar               | 46148           | C00203 C00043           | MDB0000304 HMD8000002 | 44576;1167               | 1.10  | 0.3458 | 0.9779 | 100002957 |                                  | 3665                | 606.07429 |           |
| Aminosugar Metabolism                  | glucuronate                                   | LC/MS polar               | 15443           | C16245                  | HMD80000127           | 94715;23677978;65041;444 | 0.94  | 0.7460 | 0.9839 | 100000257 | 207300-70-7                      | 3233.3              | 193.05337 |           |
|                                        | N-acetylneuraminate                           | LC/MS pos early           | 32377           | C00270                  | HMD80000230           | 439197                   | 1.29  | 0.0578 | 0.6094 | 1162      | 131-48-6                         | 660                 | 310.11326 |           |
|                                        | N-acetylglucosaminylasparagine                | LC/MS pos early           | 48149           | C04540                  | HMD80000489           | 123828                   | 1.17  | 0.2974 | 0.9370 | 1215      | 2776-93-4                        | 1212                | 336.14015 |           |
|                                        | erythronate*                                  | LC/MS polar               | 42420           |                         | HMD80000613           | 2781043                  | 0.99  | 0.9148 | 0.9839 | 100001320 | 88759-55-1                       | 2186                | 135.02989 |           |
|                                        | N-acetylglucosamineN-acetylgalactosamine      | LC/MS pos early           | 46539           | C01074                  | MDB0000212 HMD8000002 | 84265;439174             | 1.22  | 0.1699 | 0.7798 | 100006435 |                                  | 715                 | 222.0272  |           |
|                                        | N-glycylneuraminate                           | LC/MS pos early           | 37123           | C03410                  | HMD80000833           | 123802                   | 1.00  | 0.7780 | 0.9839 | 100001491 | 1113-83-3                        | 636                 | 326.10818 |           |
| TCA Cycle                              | citrate                                       | LC/MS neg                 | 1564            | C00158                  | HMD80000094           | 311                      | 1.05  | 0.5520 | 0.9839 | 1124      | 77-92-9                          | 582                 | 191.01973 |           |
|                                        | aconitate [cis or trans]                      | LC/MS neg                 | 46173           | C02341 C004174          | MDB0000589 HMD8000000 | 643757;444212            | 1.07  | 0.5846 | 0.9839 | 100001359 |                                  | 580                 | 173.00916 |           |
|                                        | alpha-ketoglutarate                           | LC/MS polar               | 528             | C00026                  | HMD80000208           | 51                       | 0.97  | 0.9510 | 0.9839 | 93        | 305-72-6;328-50-7;22202-68-2     | 2700                | 145.01425 |           |
|                                        | succinate                                     | LC/MS polar               | 1437            | C00042                  | HMD80000254           | 1110                     | 0.71  | 0.0392 | 0.5389 | 252       | 110-15-6                         | 3149                | 117.01933 |           |
|                                        | fumarate                                      | LC/MS polar               | 1643            | C00122                  | HMD80000134           | 444972                   | 0.93  | 0.7216 | 0.9839 | 330       | 100-17-8                         | 3084                | 115.03688 |           |
|                                        | malate                                        | LC/MS polar               | 1303            | C00497 C00149 C00711    | 0744 HMD800031518 HMD | 525                      | 0.87  | 0.3275 | 0.9694 | 409       | 6915-15-7                        | 3343.1              | 133.01425 |           |
|                                        | 2-methylcitrate/homocitrate                   | LC/MS neg                 | 52282           | C01251                  | MDB0002518 HMD8000003 | 515;439459               | 0.82  | 0.5225 | 0.9839 | 100008929 |                                  | 575                 | 205.03538 |           |
| Oxidative Phosphorylation              | acetylphosphate                               | LC/MS polar               | 15488           | C00227                  | HMD80001494           | 186                      | 0.96  | 0.8656 | 0.9839 | 1211      | 94249-01-1                       | 4013.9              | 138.98018 |           |
|                                        | phosphate                                     | LC/MS pos early           | 42109           | C00009                  | HMD80001429           | 1061                     | 1.02  | 0.8130 | 0.9839 | 461       | 7664-38-2                        | 576                 | 98.98418  |           |

|                                              |                                                 |                 |       |        |             |                  |                      |        |        |           |            |           |           |           |
|----------------------------------------------|-------------------------------------------------|-----------------|-------|--------|-------------|------------------|----------------------|--------|--------|-----------|------------|-----------|-----------|-----------|
| Long Chain Saturated Fatty Acid              | stearate (18:0)                                 | LC/MS neg       | 1358  | C01530 | HMDB0000827 | 5281             | 0.95                 | 0.9140 | 0.9839 | 439       | 57-11-4    | 5872      | 283.26425 |           |
|                                              | arachidate (20:0)                               | LC/MS neg       | 1118  | C06425 | HMDB0002212 | 10467            | 1.11                 | 0.4776 | 0.9839 | 893       | 506-30-9   | 6240      | 311.29555 |           |
|                                              | 10-nonadecenoate (19:1n9)                       | LC/MS neg       | 33972 |        | HMDB0013622 | 5312513          |                      | 0.8149 | 0.9839 | 100001277 | 73033-09-7 | 5780      | 295.26425 |           |
| Long Chain Monounsaturated Fatty Acid        | eicosenoate (20:1)                              | LC/MS neg       | 33587 | C16526 | MDB0002231  | HMDB0006242      | 282769;5282768;94159 | 0.93   | 0.9029 | 0.9839    | 100001335  |           | 5950      | 309.2799  |
|                                              | erucate (22:1n9)                                | LC/MS neg       | 1552  | C08316 | HMDB0002068 | 8216;5281116     | 1.34                 | 0.8893 | 0.9839 | 1087      | 112-86-7   | 6355.6    | 337.3112  |           |
| Long Chain Polyunsaturated Fatty Acid        | tetradecadienoate (14:2)*                       | LC/MS neg       | 62850 |        | HMDB0000560 | 5312409          | 1.07                 | 0.4542 | 0.9839 | 100020343 | 39039-37-7 | 5292      | 223.17035 |           |
|                                              | docosapentaenoate (n3 DPA; 22:5n3)              | LC/MS neg       | 32504 | C16513 | MDB0001976  | HMDB000065       | 6441454              | 0.88   | 0.8418 | 0.9839    | 100001181  | 2234-74-4 | 5571      | 329.2486  |
|                                              | docosahexaenoate (DHA; 22:6n3)                  | LC/MS neg       | 44675 | C06429 | HMDB0002183 | 445580           | 0.78                 | 0.7978 | 0.9839 | 100000665 | 6217-54-5  | 5525      | 327.23295 |           |
|                                              | dihomo-linoleate (20:2n6)                       | LC/MS neg       | 17805 | C16525 | HMDB0005060 | 6439848          | 0.87                 | 0.7648 | 0.9839 | 1231      | 2091-39-6  | 5730      | 307.26425 |           |
|                                              | dihomo-linolenate (20:3n3 or n6)                | LC/MS neg       | 35718 | C03242 | HMDB0002925 | 5280581          | 0.77                 | 0.7370 | 0.9839 | 100001739 | 17046-59-2 | 5596      | 305.2486  |           |
|                                              | arachidonate (20:4n6)                           | LC/MS neg       | 1110  | C00219 | HMDB0001043 | 444899           | 0.73                 | 0.6587 | 0.9839 | 229       | 506-32-1   | 5535      | 303.23295 |           |
|                                              | docosapentaenoate (n6 DPA; 22:5n6)              | LC/MS neg       | 37478 | C16513 | HMDB0001976 | 6441454          | 0.92                 | 0.9405 | 0.9839 | 100001580 | 25182-74-5 | 5624.5    | 329.2486  |           |
|                                              | docosadienoate (22:2n6)                         | LC/MS neg       | 32415 | C16533 | HMDB0061714 | 5282807          | 0.90                 | 0.9115 | 0.9839 | 100001182 | 7370-49-2  | 6034      | 335.29555 |           |
| Fatty Acid, Dicarboxylate                    | glutarate (C5-DC)                               | LC/MS polar     | 396   | C00489 | HMDB0000661 | 743;4418048      | 0.90                 | 0.6758 | 0.9839 | 339       | 110-94-1   | 2900      | 131.03498 |           |
|                                              | 2-hydroxyglutarate                              | LC/MS pos early | 52294 | C02630 | HMDB0059655 | 43               | 1.04                 | 0.6528 | 0.9839 | 100002070 | 40951-21-1 | 958       | 166.071   |           |
|                                              | adipate (C6-DC)                                 | LC/MS polar     | 21134 | C06104 | HMDB0000448 | 196              | 1.00                 | 0.8806 | 0.9839 | 100000863 | 124-04-9   | 3000      | 145.05063 |           |
| Fatty Acid Metabolism (also BCAA Metabolism) | butyrylcarnitine (C4)                           | LC/MS pos early | 32412 | C02862 | HMDB0002013 | 439829           | 0.41                 | 0.0002 | 0.0206 | 100001054 | 25576-40-3 | 2860      | 232.15434 |           |
|                                              | propionylcarnitine (C3)                         | LC/MS pos early | 32452 | C03017 | HMDB0000824 | 107738           | 0.74                 | 0.0680 | 0.6199 | 100001162 | 17298-37-2 | 2590      | 218.13869 |           |
| Fatty Acid Metabolism (Acyl Carnitine)       | acetyl carnitine (C2)                           | LC/MS pos early | 32198 | C02571 | HMDB0000201 | 7045767          | 1.02                 | 0.8110 | 0.9839 | 100000802 | 5080-50-2  | 2282      | 204.12304 |           |
| Fatty Acid Metabolism (Acyl Carnitine)       | hexanoylcarnitine (C6)                          | LC/MS pos early | 32328 |        | HMDB0000756 | 6426853          | 0.62                 | 0.3184 | 0.9577 | 100000781 | 6920-35-0  | 3358      | 260.18564 |           |
| Carnitine Metabolism                         | deoxycarnitine                                  | LC/MS pos early | 36747 | C01181 | HMDB0001161 | 22620            | 1.04                 | 0.6374 | 0.9839 | 100001662 | 6249-56-5  | 2052      | 146.11756 |           |
|                                              | carnitine                                       | LC/MS pos early | 15500 | C00487 | C00308      | HMDB0000062      | 288                  | 1.15   | 0.2556 | 0.9008    | 100000007  | 461-05-2  | 1978      | 162.11247 |
| Fatty Acid, Dihydroxy                        | 2S,3R-dihydroxybutyrate                         | LC/MS polar     | 62950 |        | HMDB0002453 | 10964471         | 1.16                 | 0.4208 | 0.9839 | 100002284 | 5057-93-2  | 1660      | 119.03498 |           |
|                                              | 2R,3R-dihydroxybutyrate                         | LC/MS polar     | 63109 |        | HMDB0000498 | 13120901         | 0.92                 | 0.9946 | 0.9973 | 100002367 | 759-06-8   | 1543      | 119.03498 |           |
| Endocannabinoid                              | stearoyl ethanolamide                           | LC/MS pos late  | 38625 |        | HMDB0013078 | 27902            | 0.91                 | 0.9507 | 0.9839 | 100002254 | 111-57-9   | 1787      | 328.32101 |           |
| Inositol Metabolism                          | myo-inositol                                    | LC/MS polar     | 1124  | C00137 | HMDB0000211 | 892              | 0.97                 | 0.9832 | 0.9967 | 363       | 87-89-8    | 3506.3    | 225.06159 |           |
|                                              | choline                                         | LC/MS pos early | 15506 | C00114 | HMDB0000097 | 305              | 0.78                 | 0.0863 | 0.6684 | 1256      | 67-48-1    | 1961      | 104.10699 |           |
| Phospholipid Metabolism                      | choline phosphate                               | LC/MS pos early | 34396 | C00588 | HMDB0001565 | 1014             | 1.25                 | 0.0796 | 0.6544 | 267       | 72556-74-2 | 700       | 184.07332 |           |
|                                              | cytidine 5'-diphosphocholine                    | LC/MS pos early | 34418 | C00307 | HMDB0001413 | 13804            | 1.26                 | 0.1005 | 0.7154 | 1220      | 33818-15-4 | 725       | 489.11461 |           |
|                                              | glycerophosphorylcholine (GPC)                  | LC/MS pos early | 15990 | C00670 | HMDB0000086 | 71920            | 0.84                 | 0.2126 | 0.8265 | 100000269 | 28319-77-9 | 672       | 258.1101  |           |
|                                              | phosphoethanolamine                             | LC/MS neg       | 1600  | C00346 | HMDB0000224 | 1015             | 1.14                 | 0.2460 | 0.8924 | 1026      | 1071-23-4  | 638       | 140.01182 |           |
|                                              | cytidine-5'-diphosphoethanolamine               | LC/MS polar     | 34410 | C00570 | HMDB0001564 | 123727           | 1.36                 | 0.0168 | 0.3458 | 100001407 | 72842-05-8 | 4210      | 445.0531  |           |
|                                              | glycerophosphoethanolamine                      | LC/MS polar     | 37455 | C01233 | HMDB0000014 | 123874           | 1.21                 | 0.0867 | 0.6684 | 100001620 | 33049-08-0 | 3075      | 214.04859 |           |
|                                              | glycerophosphoserine*                           | LC/MS polar     | 57404 |        |             | 3081457          | 1.67                 | 0.0086 | 0.3044 | 100015666 |            | 3541      | 258.03842 |           |
|                                              | glycerophosphoinositol*                         | LC/MS pos early | 52307 |        |             | 167572           | 1.27                 | 0.1002 | 0.7154 | 100001621 | 16824-65-0 | 516       | 335.07378 |           |
| Monoacylglycerol                             | 1-palmitoylglycerol (16:0)                      | LC/MS neg       | 21127 |        | HMDB0011564 | 14900            | 1.63                 | 0.2730 | 0.9238 | 100000827 | 542-44-9   | 6550      | 255.23293 |           |
|                                              | 1-oleoylglycerol (18:1)                         | LC/MS neg       | 21184 |        | HMDB0011567 | 5283468          | 1.31                 | 0.7638 | 0.9839 | 100000824 | 111-03-5   | 6650      | 281.24858 |           |
|                                              | 1-linoleoylglycerol (18:2)                      | LC/MS neg       | 27447 |        | HMDB0011568 | 5283469          | 0.94                 | 0.8984 | 0.9839 | 100001040 | 2277-28-3  | 6477      | 279.23293 |           |
|                                              | 1-dihomo-lindelylglycerol (20:3)                | LC/MS neg       | 48341 |        |             |                  | 2.07                 | 0.6125 | 0.9839 | 100006121 |            | 6400      | 305.24858 |           |
|                                              | 1-arachidonoylglycerol (20:4)                   | LC/MS neg       | 34397 | C13857 | HMDB11578   | 16019980;5282281 | 0.68                 | 0.4561 | 0.9839 | 100001433 | 35474-99-8 | 6250      | 303.23293 |           |
|                                              | 1-docosahexaenoylglycerol (22:6)                | LC/MS neg       | 35153 |        | HMDB0011587 | 53480995         | 0.79                 | 0.6397 | 0.9839 | 100001481 |            | 6150      | 309.22236 |           |
|                                              | 2-linoleoylglycerol (18:2)                      | LC/MS neg       | 32506 |        | HMDB0011538 | 5365676          | 0.85                 | 0.7909 | 0.9839 | 100000987 | 3443-82-1  | 6250      | 279.23293 |           |
|                                              | 2-arachidonoylglycerol (20:4)                   | LC/MS neg       | 19266 | C13856 | HMDB0004666 | 5282280          | 0.83                 | 0.6102 | 0.9839 | 100000584 | 53847-30-6 | 6170      | 303.23293 |           |
| Diacylglycerol                               | palmitoyl-arachidonoyl-glycerol (16:0/20:4) [2] | LC/MS pos late  | 54958 |        | HMDB0007112 | 9543736          | 0.66                 | 0.4997 | 0.9839 | 100010925 |            | 3015      | 634.54051 |           |
|                                              | stearoyl-arachidonoyl-glycerol (18:0/20:4) [1]  | LC/MS pos late  | 57450 | C00165 | HMDB0007170 | 6438587          | 0.63                 | 0.5504 | 0.9839 | 100010949 |            | 3404      | 662.57181 |           |
|                                              | stearoyl-arachidonoyl-glycerol (18:0/20:4) [2]  | LC/MS pos late  | 57449 |        | HMDB0007170 | 6438587          | 0.71                 | 0.6911 | 0.9839 | 100010950 |            | 3522      | 662.57181 |           |
|                                              | oleoyl-arachidonoyl-glycerol (18:1/20:4) [2]    | LC/MS pos late  | 54961 |        | HMDB0007228 | 9543786          | 0.66                 | 0.4200 | 0.9839 | 100010937 |            | 2990      | 660.55616 |           |
| Sphingolipid Synthesis                       | sphinganine                                     | LC/MS pos late  | 17769 | C00836 | HMDB0000269 | 3126             | 0.72                 | 0.4214 | 0.9839 | 313       | 3102-56-5  | 1413      | 302.30536 |           |
| Dihydroceramides                             | N-palmitoyl-sphinganine (d18:0/16:0)            | LC/MS pos late  | 52604 |        | HMDB11760   | 5283572          | 0.91                 | 0.8516 | 0.9839 | 100009028 | 5966-29-0  | 3090      | 540.53503 |           |
|                                              | N-palmitoyl-sphingosine (d18:1/16:0)            | LC/MS pos late  | 44877 |        | HMDB0004949 | 5283564          | 1.00                 | 0.8852 | 0.9839 | 1518      | 24696-26-2 | 2893      | 538.51937 |           |
| Ceramides                                    | N-stearoyl-sphingosine (d18:1/18:0)*            | LC/MS pos late  | 54979 |        | HMDB0004950 | 5283565          | 1.02                 | 0.7871 | 0.9839 | 1547      | 10404-17-3 | 3392      | 566.55067 |           |
|                                              | N-palmitoyl-sphingadinenine (d18:2/16:0)*       | LC/MS pos late  | 57416 |        |             |                  | 1.05                 | 0.7627 | 0.9839 | 100015609 |            | 2490      | 536.50372 |           |
|                                              | ceramide (d18:1/20:0, d16:1/22:0, d20:1/18:0)*  | LC/MS pos late  | 57440 |        |             |                  | 1.00                 | 0.8732 | 0.9839 | 100015755 |            | 3920      | 594.58199 |           |
|                                              | ceramide (d16:1/24:1, d18:1/22:1)*              | LC/MS pos late  | 57437 |        |             |                  | 1.13                 | 0.6186 | 0.9839 | 100015727 |            | 3850      | 620.59763 |           |
|                                              | ceramide (d18:2/24:1, d18:1/24:2)*              | LC/MS pos late  | 57443 |        |             |                  | 1.07                 | 0.7208 | 0.9839 | 100015744 |            | 3858      | 646.6133  |           |
|                                              | glycosyl-N-stearoyl-sphinganine (d18:0/18:0)*   | LC/MS pos late  | 57418 |        |             | 6321364          | 0.76                 | 0.6474 | 0.9839 | 100015694 |            | 3134      | 730.61915 |           |
| Hexosylceramides (HCER)                      | glycosyl-N-palmitoyl-sphingosine (d18:1/16:0)   | LC/MS pos late  | 53013 |        |             |                  | 0.93                 | 0.9599 | 0.9839 | 100009272 |            | 2623      | 700.5722  |           |
|                                              | glycosyl-N-stearoyl-sphingosine (d18:1/18:0)    | LC/MS pos late  | 52234 |        |             |                  | 0.94                 | 0.9589 | 0.9839 | 100001882 |            | 3063      | 728.6035  |           |
|                                              | glycosyl-N-arachidoyl-sphingosine (d18:1/20:0)  | LC/MS pos late  | 57423 |        | HMDB0004973 | 6321358          | 0.90                 | 0.9524 | 0.9839 | 100015714 |            | 3432      | 756.6348  |           |
|                                              | glycosyl-N-behenoyl-sphingosine (d18:1/22:0)*   | LC/MS pos late  | 57371 |        |             |                  | 0.84                 | 0.8423 | 0.9839 | 100015622 |            | 4058      | 784.6661  |           |
|                                              | glycosyl-N-nervonoyl-sphingosine (d18:1/24:1)   | LC/MS pos late  | 57369 |        | HMDB0010712 | HMDB000049       | 53480656;20057357    | 0.91   | 0.9385 | 0.9839    | 100001878  |           | 3990      | 810.68175 |
|                                              | glycosyl ceramide (d16:1/24:1, d18:1/22:1)*     | LC/MS pos late  | 57457 |        |             |                  | 0.93                 | 0.9024 | 0.9839 | 100015730 |            | 3373      | 782.65045 |           |
|                                              | glycosyl ceramide (d18:2/24:1, d18:1/24:2)*     | LC/MS pos late  | 57453 |        |             |                  | 0.92                 | 0.9380 | 0.9839 | 100015745 |            | 3380      | 808.66809 |           |
|                                              | palmitoyl dihydrospingomyelin (d18:0/16:0)*     | LC/MS pos late  | 52434 |        | HMDB0010168 | 9939965          | 0.49                 | 0.2049 | 0.8265 | 100008954 |            | 2290      | 705.5905  |           |
| Dihydrospingomyelins                         | behenoyl dihydrospingomyelin (d18:0/22:0)*      | LC/MS pos late  | 57331 |        | HMDB0012091 | 44260132         | 0.48                 | 0.1290 | 0.7698 | 100009026 |            | 3300      | 789.68441 |           |
|                                              | sphingomyelin (d18:0/18:0, d19:0/17:0)*         | LC/MS pos late  | 57473 |        | HMDB0012087 | 44260130         | 0.45                 | 0.2523 | 0.8977 | 100009027 |            | 2500      | 733.6218  |           |
|                                              | sphingomyelin (d18:0/20:0, d16:0/22:0)*         | LC/MS pos late  | 57476 |        |             |                  | 0.46                 | 0.1246 | 0.7698 | 100015786 |            | 2850      | 761.65311 |           |

|                                               |                                                    |                 |       |                                                                      |                             |                       |             |        |        |           |                       |        |           |
|-----------------------------------------------|----------------------------------------------------|-----------------|-------|----------------------------------------------------------------------|-----------------------------|-----------------------|-------------|--------|--------|-----------|-----------------------|--------|-----------|
| Sphingomyelins                                | palmitoyl sphingomyelin (d18:1/16:0)               | LC/MS pos late  | 37506 |                                                                      | <a href="#">HMDB0010169</a> | 9939941               | 0.65        | 0.4536 | 0.9839 | 100002107 | 6254-89-3             | 2168   | 703.57485 |
|                                               | stearoyl sphingomyelin (d18:1/18:0)                | LC/MS pos late  | 19503 | <a href="#">C00550</a>                                               | <a href="#">HMDB0001348</a> | 6453725               | 0.67        | 0.4474 | 0.9839 | 1538      | 85187-10-6,85187-10-6 | 2450   | 731.60615 |
|                                               | behencyl sphingomyelin (d18:1/22:0)*               | LC/MS pos late  | 48492 |                                                                      | <a href="#">HMDB0012103</a> | 44260125              | 0.62        | 0.3915 | 0.9839 | 100006294 |                       | 3250   | 787.66876 |
|                                               | tricosanoyl sphingomyelin (d18:1/23:0)*            | LC/MS pos late  | 52436 |                                                                      | <a href="#">HMDB0012105</a> |                       | 0.68        | 0.5909 | 0.9839 | 100008955 |                       | 3350   | 801.68441 |
|                                               | lignoceroyl sphingomyelin (d18:1/24:0)             | LC/MS pos late  | 57330 |                                                                      |                             |                       | 0.65        | 0.4318 | 0.9839 | 100006298 | 60037-60-7            | 3437   | 815.70006 |
|                                               | sphingomyelin (d18:2/23:1)*                        | LC/MS pos late  | 57482 |                                                                      |                             |                       | 0.70        | 0.5632 | 0.9839 | 100015791 |                       | 2500   | 797.65308 |
|                                               | sphingomyelin (d18:2/24:2)*                        | LC/MS pos late  | 57479 |                                                                      |                             |                       | 0.73        | 0.5174 | 0.9839 | 100015789 |                       | 2400   | 809.65308 |
|                                               | sphingomyelin (d18:1/14:0, d16:1/16:0)*            | LC/MS pos late  | 42463 |                                                                      | <a href="#">HMDB0012097</a> | 11433862              | 0.68        | 0.5888 | 0.9839 | 100004328 |                       | 1998   | 675.54355 |
|                                               | sphingomyelin (d17:1/16:0, d18:1/15:0, d16:1/17:0) | LC/MS pos late  | 52433 |                                                                      |                             |                       | 0.68        | 0.5015 | 0.9839 | 100006314 | 121999-58-4           | 2082   | 689.5592  |
|                                               | sphingomyelin (d18:2/16:0, d18:1/16:1)*            | LC/MS pos late  | 42459 |                                                                      |                             |                       | 0.72        | 0.5939 | 0.9839 | 100004329 |                       | 2002   | 701.5592  |
|                                               | sphingomyelin (d18:1/17:0, d17:1/18:0, d19:1/16:0) | LC/MS pos late  | 52615 |                                                                      |                             | 46891763              | 0.61        | 0.4368 | 0.9839 | 100008920 | 121999-64-2           | 2350   | 717.5905  |
|                                               | sphingomyelin (d18:1/18:1, d18:2/18:0)             | LC/MS pos late  | 37529 |                                                                      | <a href="#">HMDB0012101</a> | 6443882               | 0.66        | 0.4664 | 0.9839 | 100002106 | 108392-10-5           | 2167   | 729.5905  |
|                                               | sphingomyelin (d18:1/19:0, d19:1/18:0)*            | LC/MS pos late  | 57475 |                                                                      |                             |                       | 0.57        | 0.3981 | 0.9839 | 100015787 |                       | 2550   | 745.62178 |
|                                               | sphingomyelin (d18:1/20:0, d16:1/22:0)*            | LC/MS pos late  | 48490 |                                                                      | <a href="#">HMDB0012102</a> | 44260124              | 0.62        | 0.4225 | 0.9839 | 100006290 |                       | 2800   | 759.6375  |
|                                               | sphingomyelin (d18:1/20:1, d18:2/20:0)*            | LC/MS pos late  | 48491 |                                                                      |                             |                       | 0.58        | 0.3049 | 0.9370 | 100006292 | 222403-67-0           | 2450   | 757.6218  |
|                                               | sphingomyelin (d18:1/21:0, d17:1/22:0, d16:1/23:0) | LC/MS pos late  | 52495 |                                                                      |                             |                       | 0.63        | 0.4026 | 0.9839 | 100009025 |                       | 3000   | 773.65311 |
|                                               | sphingomyelin (d18:1/22:1, d18:2/22:0, d16:1/24:0) | LC/MS pos late  | 48493 |                                                                      | <a href="#">HMDB0012104</a> |                       | 0.65        | 0.5126 | 0.9839 | 100006295 |                       | 2775   | 785.65311 |
|                                               | sphingomyelin (d18:1/22:2, d18:2/22:1, d16:1/24:0) | LC/MS pos late  | 57477 |                                                                      |                             |                       | 0.62        | 0.3890 | 0.9839 | 100006296 |                       | 2350   | 783.63746 |
|                                               | sphingomyelin (d18:1/24:1, d18:2/24:0)*            | LC/MS pos late  | 47153 |                                                                      | <a href="#">HMDB0012107</a> | 44260126              | 0.73        | 0.6062 | 0.9839 | 100005986 | 94359-13-4            | 3200   | 813.68441 |
|                                               | sphingomyelin (d18:2/24:1, d18:1/24:2)*            | LC/MS pos late  | 52437 |                                                                      |                             | 85336023              | 0.70        | 0.5587 | 0.9839 | 100008957 |                       | 2750   | 811.66868 |
| Sphingosines                                  | sphingosine                                        | LC/MS pos late  | 17747 | <a href="#">C00319</a>                                               | <a href="#">HMDB0000252</a> | 5280335               | 0.78        | 0.6494 | 0.9839 | 297       | 123-78-4              | 1393   | 300.28971 |
| Mevalonate Metabolism                         | 3-hydroxy-3-methylglutarate                        | LC/MS polar     | 531   | <a href="#">C03761</a>                                               | <a href="#">HMDB0000355</a> | 1662:545993           | 0.94        | 0.7088 | 0.9839 | 112       | 503-49-1              | 2850   | 161.04555 |
| Sterol                                        | cholesterol                                        | LC/MS pos late  | 63    | <a href="#">C00187</a>                                               | <a href="#">HMDB0000067</a> | 9432584;11025495;5997 | 0.81        | 0.7784 | 0.9839 | 266       | 57-88-5               | 2707   | 369.35159 |
|                                               | cholesterol sulfate                                | LC/MS polar     | 35324 | <a href="#">C18043</a>                                               | <a href="#">HMDB006653</a>  | 65076                 | 0.79        | 0.6632 | 0.9839 | 100001806 | 2864-50-8             | 681    | 465.30434 |
|                                               | 4-cholesten-3-one                                  | LC/MS pos late  | 38125 | <a href="#">C00599</a>                                               | <a href="#">HMDB0000921</a> | 91477                 | 1.06        | 0.6112 | 0.9839 | 100002227 | 601-57-0              | 2520   | 385.3465  |
|                                               | campesterol                                        | LC/MS pos late  | 33997 | <a href="#">C01789</a>                                               | <a href="#">HMDB0002869</a> | 173183                | 1.08        | 0.8485 | 0.9839 | 100001269 | 474-62-4              | 2873   | 383.36724 |
|                                               | 7-hydroxycholesterol (alpha or beta)               | LC/MS pos late  | 47890 | <a href="#">C15610</a>                                               | <a href="#">HMDB0006149</a> | 15571093              | 0.80        | 0.5971 | 0.9839 | 100005999 |                       | 1930   | 367.33594 |
| Primary Bile Acid Metabolism                  | taurochenodeoxycholate                             | LC/MS neg       | 18494 | <a href="#">C05465</a>                                               | <a href="#">HMDB0000951</a> | 387316                | 0.99        | 0.9459 | 0.9839 | 1629      | 6009-98-9             | 5250   | 498.28948 |
| Purine Metabolism, (Hypo)Xanthine/nucleosides | inosine 5'-monophosphate (IMP)                     | LC/MS pos early | 2133  | <a href="#">C00130</a>                                               | <a href="#">HMDB0000175</a> | 8582                  | <b>1.58</b> | 0.0115 | 0.3044 | 362       | 4691-65-0             | 650    | 349.05438 |
|                                               | inosine                                            | LC/MS neg       | 1123  | <a href="#">C00294</a>                                               | <a href="#">HMDB0000195</a> | 6021                  | 1.01        | 0.6923 | 0.9839 | 361       | 58-63-9               | 1602.1 | 267.07349 |
|                                               | hypoxanthine                                       | LC/MS neg       | 3127  | <a href="#">C00262</a>                                               | <a href="#">HMDB0000157</a> | 790;135398638         | 1.16        | 0.1720 | 0.7798 | 171       | 68-94-0               | 1291.2 | 135.03123 |
|                                               | xanthine                                           | LC/MS polar     | 3147  | <a href="#">C00385</a>                                               | <a href="#">HMDB0000292</a> | 1188                  | <b>1.38</b> | 0.0194 | 0.3594 | 1004      | 69-89-6               | 2023   | 151.02615 |
|                                               | xanthosine                                         | LC/MS neg       | 15136 | <a href="#">C001762</a>                                              | <a href="#">HMDB0000299</a> | 64959                 | 0.97        | 0.9455 | 0.9839 | 100000299 | 146-80-0              | 1075   | 283.0684  |
|                                               | urate                                              | LC/MS pos early | 1604  | <a href="#">C00366</a>                                               | <a href="#">HMDB0000289</a> | 1175                  | 0.83        | 0.2498 | 0.8972 | 1134      | 69-93-2;120K5305      | 776    | 169.03562 |
|                                               | allantoin                                          | LC/MS polar     | 1107  | <a href="#">C02350</a> <a href="#">C02348</a> <a href="#">C01551</a> | <a href="#">HMDB0000462</a> | 204:439714;439713     | 0.93        | 0.6990 | 0.9839 | 1002      | 97-59-6               | 1672   | 157.03671 |
| Purine Metabolism, Adenine containing         | adenosine 5'-monophosphate (AMP)                   | LC/MS pos early | 32342 | <a href="#">C00020</a>                                               | <a href="#">HMDB0000045</a> | 6083                  | 1.11        | 0.3775 | 0.9839 | 209       | 149022-20-8           | 1013   | 348.07037 |
|                                               | adenosine 3'-monophosphate (3'-AMP)                | LC/MS neg       | 35142 | <a href="#">C01267</a>                                               | <a href="#">HMDB0003540</a> | 41211                 | 1.02        | 0.7297 | 0.9839 | 100001449 | 84-21-9               | 1245   | 346.0558  |
|                                               | adenosine 2'-monophosphate (2'-AMP)                | LC/MS neg       | 36815 | <a href="#">C00946</a>                                               | <a href="#">HMDB0011617</a> | 94136                 | <b>1.61</b> | 0.0667 | 0.6199 | 100001694 | 130-49-4              | 1497.7 | 346.0558  |
|                                               | adenosine 3',5'-diphosphate                        | LC/MS neg       | 15691 | <a href="#">C00054</a>                                               | <a href="#">HMDB0000061</a> | 159296                | 1.21        | 0.2742 | 0.9238 | 1214      | 75431-54-8            | 575    | 426.02214 |
|                                               | adenylosuccinate                                   | LC/MS neg       | 18360 | <a href="#">C03794</a>                                               | <a href="#">HMDB0000536</a> | 440122                | 1.06        | 0.9685 | 0.9846 | 1303      | 19046-78-7            | 560    | 230.52974 |
|                                               | adenosine                                          | LC/MS pos early | 555   | <a href="#">C00212</a>                                               | <a href="#">HMDB0000050</a> | 60961                 | 1.25        | 0.8361 | 0.9839 | 798       | 58-61-7               | 2169   | 268.10404 |
|                                               | adenine                                            | LC/MS neg       | 554   | <a href="#">C00147</a>                                               | <a href="#">HMDB0000034</a> | 190                   | <b>1.38</b> | 0.0609 | 0.6094 | 880       | 73-24-5               | 1680   | 134.04722 |
| Purine Metabolism, Guanine containing         | N1-methyladenosine                                 | LC/MS pos early | 15650 | <a href="#">C02494</a>                                               | <a href="#">HMDB0003331</a> | 27476                 | <b>1.48</b> | 0.0462 | 0.5700 | 1242      | 15763-06-1            | 2120   | 282.11969 |
|                                               | guanosine 5'-diphosphate (GDP)                     | LC/MS neg       | 2848  | <a href="#">C00035</a>                                               | <a href="#">HMDB0001201</a> | 135398619             | <b>0.59</b> | 0.0482 | 0.5751 | 346       | 43139-22-6            | 639    | 442.01706 |
|                                               | guanosine 5'-monophosphate (5'-GMP)                | LC/MS pos early | 2849  | <a href="#">C00144</a>                                               | <a href="#">HMDB0001397</a> | 6804                  | <b>1.28</b> | 0.0368 | 0.5389 | 347       | 12/9/50               | 800    | 364.05528 |
|                                               | guanosine                                          | LC/MS neg       | 1573  | <a href="#">C00387</a>                                               | <a href="#">HMDB0000133</a> | 6802                  | 1.12        | 0.4998 | 0.9839 | 1099      | 118-00-3              | 1662   | 282.08439 |
|                                               | guanine                                            | LC/MS pos early | 32352 | <a href="#">C00242</a>                                               | <a href="#">HMDB0000132</a> | 135398634             | 1.23        | 0.1488 | 0.7748 | 172       | 73-40-5               | 2032   | 152.05669 |
| Pyrimidine Metabolism, Orotate containing     | N-carbamoylaspartate                               | LC/MS polar     | 1594  | <a href="#">C00438</a>                                               | <a href="#">HMDB0000828</a> | 93072                 | <b>0.71</b> | 0.0139 | 0.3219 | 1108      | 923-37-5              | 3800   | 175.03604 |
|                                               | orotate                                            | LC/MS polar     | 1505  | <a href="#">C00295</a>                                               | <a href="#">HMDB0000226</a> | 967                   | 0.87        | 0.3408 | 0.9779 | 445       | 50887-69-9            | 1638.1 | 155.00983 |
|                                               | orotidine                                          | LC/MS polar     | 35172 |                                                                      | <a href="#">HMDB0000788</a> | 92751                 | 0.80        | 0.1107 | 0.7698 | 100001416 | 314-50-1              | 2250   | 287.05209 |
| Pyrimidine Metabolism, Uracil containing      | uridine 5'-triphosphate (UTP)                      | LC/MS neg       | 33448 | <a href="#">C00075</a>                                               | <a href="#">HMDB0000285</a> | 8133                  | <b>0.38</b> | 0.0123 | 0.3044 | 871       | 19817-92-6            | 572    | 482.96126 |
|                                               | uridine 5'-diphosphate (UDP)                       | LC/MS neg       | 5345  | <a href="#">C00015</a>                                               | <a href="#">HMDB0000295</a> | 6031                  | <b>0.66</b> | 0.0576 | 0.6094 | 870       | 21931-53-3            | 599.5  | 402.99492 |
|                                               | uridine 5'-monophosphate (UMP)                     | LC/MS polar     | 2856  | <a href="#">C00105</a>                                               | <a href="#">HMDB0000288</a> | 6030                  | 1.16        | 0.2015 | 0.5150 | 869       | 3387-36-8             | 4150   | 323.02859 |
|                                               | uridine-2',3'-cyclic monophosphate                 | LC/MS neg       | 37137 | <a href="#">C02355</a>                                               | <a href="#">HMDB0011640</a> | 439715                | 0.97        | 0.7002 | 0.9839 | 75        | 40632-52-8            | 1090   | 305.01803 |
|                                               | uridine                                            | LC/MS neg       | 606   | <a href="#">C00299</a>                                               | <a href="#">HMDB0000296</a> | 6029                  | <b>1.15</b> | 0.2087 | 0.8265 | 535       | 58-96-8               | 1457.6 | 243.06226 |
|                                               | uracil                                             | LC/MS polar     | 605   | <a href="#">C00106</a>                                               | <a href="#">HMDB0000300</a> | 1174                  | <b>1.63</b> | 0.0012 | 0.0699 | 825       | 66-22-8               | 1089.7 | 111.02    |
|                                               | pseudouridine                                      | LC/MS neg       | 33442 | <a href="#">C02067</a>                                               | <a href="#">HMDB0000767</a> | 15047                 | 1.14        | 0.2459 | 0.8924 | 821       | 1445-07-4             | 1100   | 243.06226 |
| Pyrimidine Metabolism, Cytidine containing    | 5,6-dihydrouridine                                 | LC/MS neg       | 61833 |                                                                      | <a href="#">HMDB0000497</a> | 94312                 | 0.90        | 0.5363 | 0.9839 | 100001425 | 5/4/27                | 1119   | 245.07791 |
|                                               | cytidine triphosphate                              | LC/MS neg       | 2844  | <a href="#">C00063</a>                                               | <a href="#">HMDB0000082</a> | 6176                  | <b>0.42</b> | 0.0393 | 0.5389 | 281       | 36051-68-0            | 575    | 481.97724 |
|                                               | cytidine diphosphate                               | LC/MS neg       | 2841  | <a href="#">C00112</a>                                               | <a href="#">HMDB0001546</a> | 6132                  | 0.76        | 0.2173 | 0.8265 | 280       | 34393-59-4            | 580    | 402.01091 |
|                                               | cytidine 5'-monophosphate (5'-CMP)                 | LC/MS pos early | 2372  | <a href="#">C00055</a>                                               | <a href="#">HMDB0000095</a> | 6131                  | 1.17        | 0.1365 | 0.7698 | 282       | 63-37-6               | 835    | 324.05914 |
|                                               | cytidine 2',3'-cyclic monophosphate                | LC/MS neg       | 37465 | <a href="#">C02354</a>                                               | <a href="#">HMDB0011691</a> | 2342172               | 0.95        | 0.5554 | 0.9839 | 73        | 15718-51-1            | 937    | 304.03401 |
|                                               | cytidine                                           | LC/MS neg       | 514   | <a href="#">C00475</a>                                               | <a href="#">HMDB0000089</a> | 6175                  | <b>1.47</b> | 0.0161 | 0.3458 | 827       | 65-46-3               | 1325   | 242.07824 |
|                                               | 2'-deoxycytidine 5'-monophosphate                  | LC/MS pos early | 533   | <a href="#">C00239</a>                                               | <a href="#">HMDB0001202</a> | 13945                 | <b>1.49</b> | 0.0099 | 0.3044 | 298       | 1032-65-1             | 975    | 308.06422 |
| Pyrimidine Metabolism, Thymine containing     | thymidine                                          | LC/MS neg       | 2183  | <a href="#">C00214</a>                                               | <a href="#">HMDB0000273</a> | 5789                  | <b>1.38</b> | 0.0462 | 0.5700 | 872       | 50-89-5               | 1983.7 | 241.06299 |
| Purine and Pyrimidine Metabolism              | methylphosphate                                    | LC/MS pos early | 37070 |                                                                      | <a href="#">HMDB61711</a>   | 13130                 | 0.78        | 0.5521 | 0.9839 | 100001805 | 7023-27-0             | 544    | 112.99963 |

|                                        |                                           |                 |       |                        |                             |                |      |        |        |           |                     |        |           |
|----------------------------------------|-------------------------------------------|-----------------|-------|------------------------|-----------------------------|----------------|------|--------|--------|-----------|---------------------|--------|-----------|
| Nicotinate and Nicotinamide Metabolism | nicotinate                                | LC/MS neg       | 1504  | <a href="#">C00253</a> | <a href="#">HMDB0001488</a> | 938            | 1.17 | 0.1272 | 0.7698 | 567       | 59-67-6             | 1180   | 122.02475 |
|                                        | nicotinamide                              | LC/MS neg       | 594   | <a href="#">C00153</a> | <a href="#">HMDB0001406</a> | 936            | 1.00 | 0.8573 | 0.9839 | 432       | 98-92-0             | 1796.8 | 121.04073 |
|                                        | nicotinamide riboside                     | LC/MS pos early | 33013 | <a href="#">C03150</a> | <a href="#">HMDB0000855</a> | 439924         | 1.19 | 0.1931 | 0.8265 | 100001310 | 1341-23-7           | 2040   | 255.09755 |
|                                        | nicotinamide adenine dinucleotide (NAD+)  | LC/MS neg       | 5278  | <a href="#">C00006</a> | <a href="#">HMDB0000217</a> | 5892           | 0.76 | 0.2748 | 0.9238 | 1310      | 53-84-9             | 1434   | 662.10184 |
|                                        | trigonelline (N'-methylnicotinate)        | LC/MS pos early | 32401 | <a href="#">C01004</a> | <a href="#">HMDB0000875</a> | 5570           | 1.18 | 0.3366 | 0.9779 | 100001092 | 535-83-1            | 1388   | 138.05496 |
|                                        | adenosine 5'-diphosphoribose (ADP-ribose) | LC/MS neg       | 558   | <a href="#">C00301</a> | <a href="#">HMDB0001178</a> | 192            | 0.46 | 0.0116 | 0.3044 | 215       | 68414-18-6          | 920    | 558.06439 |
| Riboflavin Metabolism                  | flavin adenine dinucleotide (FAD)         | LC/MS neg       | 2134  | <a href="#">C00016</a> | <a href="#">HMDB0001248</a> | 643975         | 0.85 | 0.6892 | 0.9839 | 327       | 146-14-5;84366-81-4 | 2425   | 784.14985 |
| Pantothenate and CoA Metabolism        | pantothenate                              | LC/MS pos early | 1508  | <a href="#">C00864</a> | <a href="#">HMDB0000210</a> | 6613           | 1.02 | 0.8081 | 0.9839 | 1024      | 137-08-6            | 1667   | 220.11795 |
|                                        | coenzyme A                                | LC/MS neg       | 46322 | <a href="#">C00010</a> | <a href="#">HMDB0001423</a> | 87642          | 0.98 | 0.7694 | 0.9839 | 270       | 85-61-0;18439-24-2  | 1448   | 382.55033 |
| Ascorbate and Aldarate Metabolism      | 2-O-methylascorbic acid                   | LC/MS polar     | 63990 |                        | <a href="#">HMDB0240294</a> | 54726398       | 0.85 | 0.3064 | 0.9370 | 100003258 | 17860-87-6          | 1512   | 189.04046 |
|                                        | threonate                                 | LC/MS polar     | 27738 | <a href="#">C01620</a> | MDB0000943 HMDB00626        | 5460407;151152 | 0.90 | 0.5188 | 0.9839 | 100001022 | 70753-61-6          | 2384   | 135.02989 |
|                                        | gulonate*                                 | LC/MS polar     | 46957 | <a href="#">C00800</a> | <a href="#">HMDB0003290</a> | 152304         | 1.16 | 0.2874 | 0.9327 | 100001586 | 20246-53-1          | 2750   | 195.05102 |
| Tocopherol Metabolism                  | alpha-tocopherol                          | LC/MS pos late  | 1561  | <a href="#">C02477</a> | <a href="#">HMDB0001893</a> | 86472          | 0.88 | 0.9524 | 0.9839 | 1105      | 59-02-9;10191-41-0  | 2522   | 430.37818 |
| Pterin Metabolism                      | pterin                                    | LC/MS neg       | 43023 | <a href="#">C00715</a> | <a href="#">HMDB0000802</a> | 135398660      | 1.06 | 0.5176 | 0.9839 | 100004216 | 22363-60-4          | 1370   | 162.04213 |
| Thiamine Metabolism                    | thiamin (Vitamin B1)                      | LC/MS pos early | 5341  | DG00125 C00378 D08580  | <a href="#">HMDB0000235</a> | 1130           | 1.17 | 0.2189 | 0.8265 | 873       | 59-43-8             | 3050   | 265.11176 |
|                                        | thiamin diphosphate                       | LC/MS neg       | 35670 | <a href="#">C00068</a> | <a href="#">HMDB0001372</a> | 1132           | 0.76 | 0.3498 | 0.9779 | 522       | 154-87-0            | 1195.1 | 423.02986 |
| Vitamin B6 Metabolism                  | pyridoxine (Vitamin B6)                   | LC/MS neg       | 608   | <a href="#">D08454</a> | <a href="#">HMDB0000239</a> | 1054           | 0.78 | 0.1614 | 0.7798 | 936       | 58-56-0             | 1657   | 168.06661 |
|                                        | pyridoxate                                | LC/MS polar     | 31555 | <a href="#">C00847</a> | <a href="#">HMDB0000017</a> | 6723           | 0.81 | 0.1468 | 0.7748 | 100001121 | 82-82-6             | 846    | 182.04588 |
| Benzoate Metabolism                    | hippurate                                 | LC/MS neg       | 15753 | <a href="#">C01586</a> | <a href="#">HMDB0000714</a> | 464            | 0.83 | 0.2148 | 0.8265 | 100000014 | 495-69-2            | 2106.9 | 178.05096 |
|                                        | benzoate                                  | LC/MS neg       | 15778 | <a href="#">C00180</a> | <a href="#">HMDB0001870</a> | 243            | 0.67 | 0.2169 | 0.8265 | 100000008 | 65-85-0             | 1750   | 121.0295  |
| Food Component/Plant                   | ergothioneine                             | LC/MS pos early | 37459 | <a href="#">C05570</a> | <a href="#">HMDB0003045</a> | 5351619        | 1.46 | 0.0312 | 0.4934 | 100002154 | 58511-63-0          | 850    | 230.09578 |
|                                        | erythritol                                | LC/MS polar     | 20699 | <a href="#">C00503</a> | <a href="#">HMDB0002994</a> | 222285         | 0.88 | 0.3577 | 0.9804 | 100000846 | 149-32-6            | 1491   | 167.05611 |
|                                        | homostachydrine*                          | LC/MS pos early | 33009 | <a href="#">C08283</a> | <a href="#">HMDB0033433</a> | 441447         | 1.09 | 0.4509 | 0.9839 | 100001550 | 1195-94-4           | 1750   | 158.11756 |
|                                        | mannonate*                                | LC/MS polar     | 62864 |                        |                             | 3246006        | 0.83 | 0.5080 | 0.9839 | 100003695 | 642-99-9            | 2736   | 195.05102 |
|                                        | stachydrine                               | LC/MS pos early | 34384 | <a href="#">C10172</a> | <a href="#">HMDB0004827</a> | 115244         | 1.00 | 0.8985 | 0.9839 | 100001296 | 4136-37-2           | 1440   | 144.10191 |
| Drug - Antibiotic                      | penicillin G                              | LC/MS pos early | 37468 | <a href="#">C05551</a> | <a href="#">HMDB0015186</a> | 5904           | 0.77 | 0.1208 | 0.7698 | 100002155 | 69-57-8             | 2870   | 335.10601 |
| Chemical                               | sulfate*                                  | LC/MS neg       | 46960 | <a href="#">C00059</a> | <a href="#">HMDB01448</a>   | 5152822        | 0.85 | 0.2830 | 0.9272 | 100002528 | 14808-79-8          | 616    | 96.9601   |
|                                        | phenol red                                | LC/MS neg       | 36817 | <a href="#">C12600</a> |                             | 4766           | 0.80 | 0.1758 | 0.7839 | 100001724 | 143-74-8            | 3665.9 | 353.04891 |
|                                        | 4-acetamidobenzoate                       | LC/MS neg       | 57585 | <a href="#">D03836</a> |                             | 6918889        | 0.83 | 0.1179 | 0.7698 | 100009413 | 556-08-1            | 1403   | 178.05096 |
|                                        | thiopropine                               | LC/MS pos early | 53231 |                        |                             | 93176          | 0.91 | 0.8532 | 0.9839 | 100009232 | 34592-47-4          | 1250   | 134.02703 |
| Partially Characterized Molecules      | glutamine_degradant*                      | LC/MS pos early | 46225 |                        |                             |                | 0.88 | 0.4607 | 0.9839 | 100001540 | 2353-44-8           | 1900   | 129.06586 |
