# Supplementary figures and images for: Upregulated ethanolamine phospholipid synthesis via selenoprotein I is required for effective metabolic reprogramming during T cell activation
Source: PubMed Central journal article supplement — Mol Metab. 2021 Jan 20;47:101170. doi: 10.1016/j.molmet.2021.101170 (PMC7881273; doi:10.1016/j.molmet.2021.101170), 2021-01-20

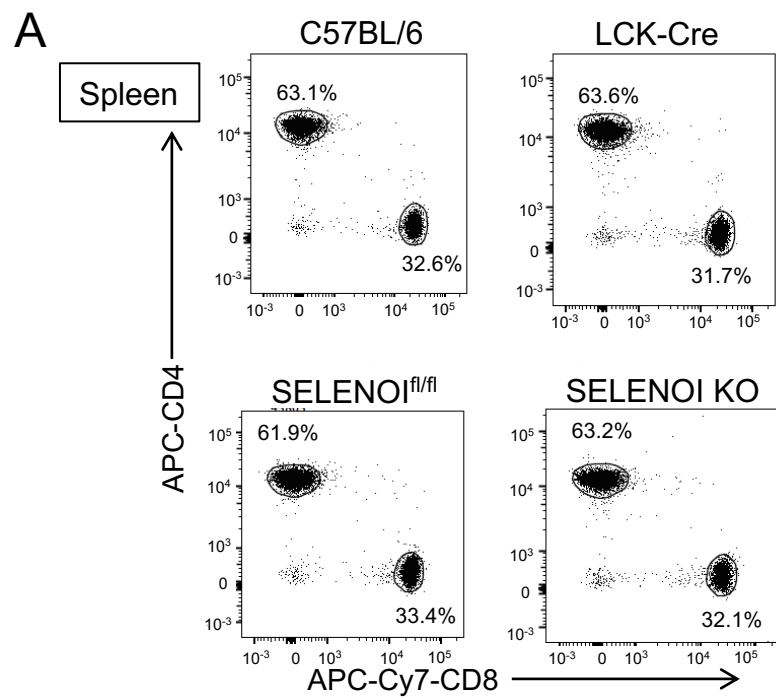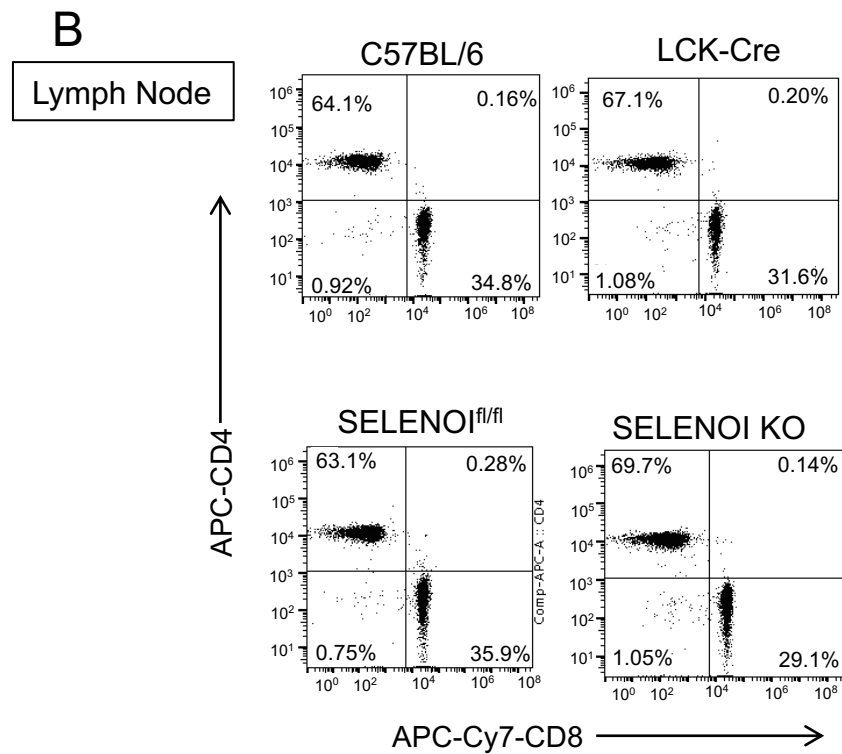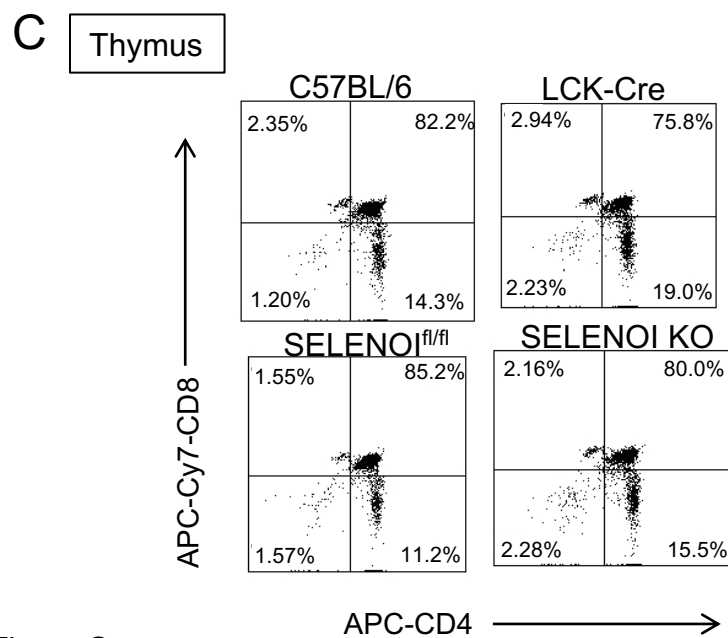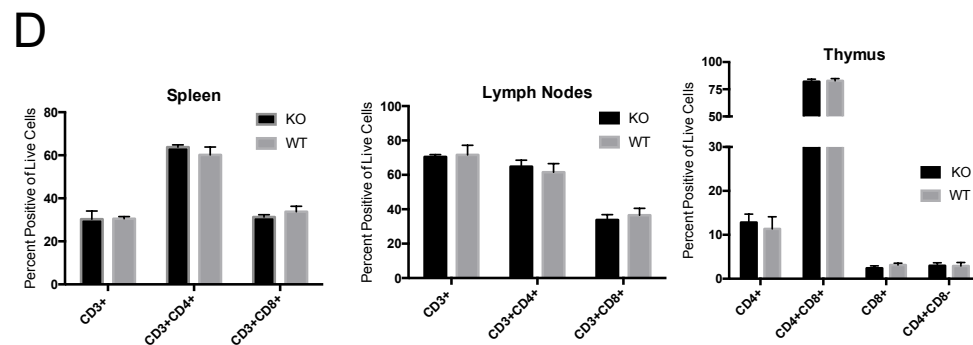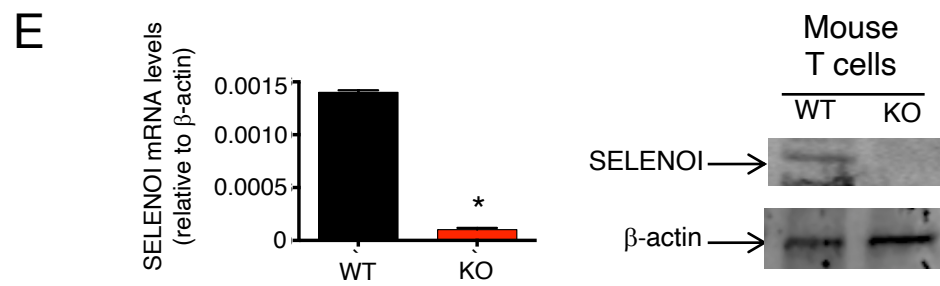

Figure S1

Supplement: mmc1.pdf [file mmc1.pdf]

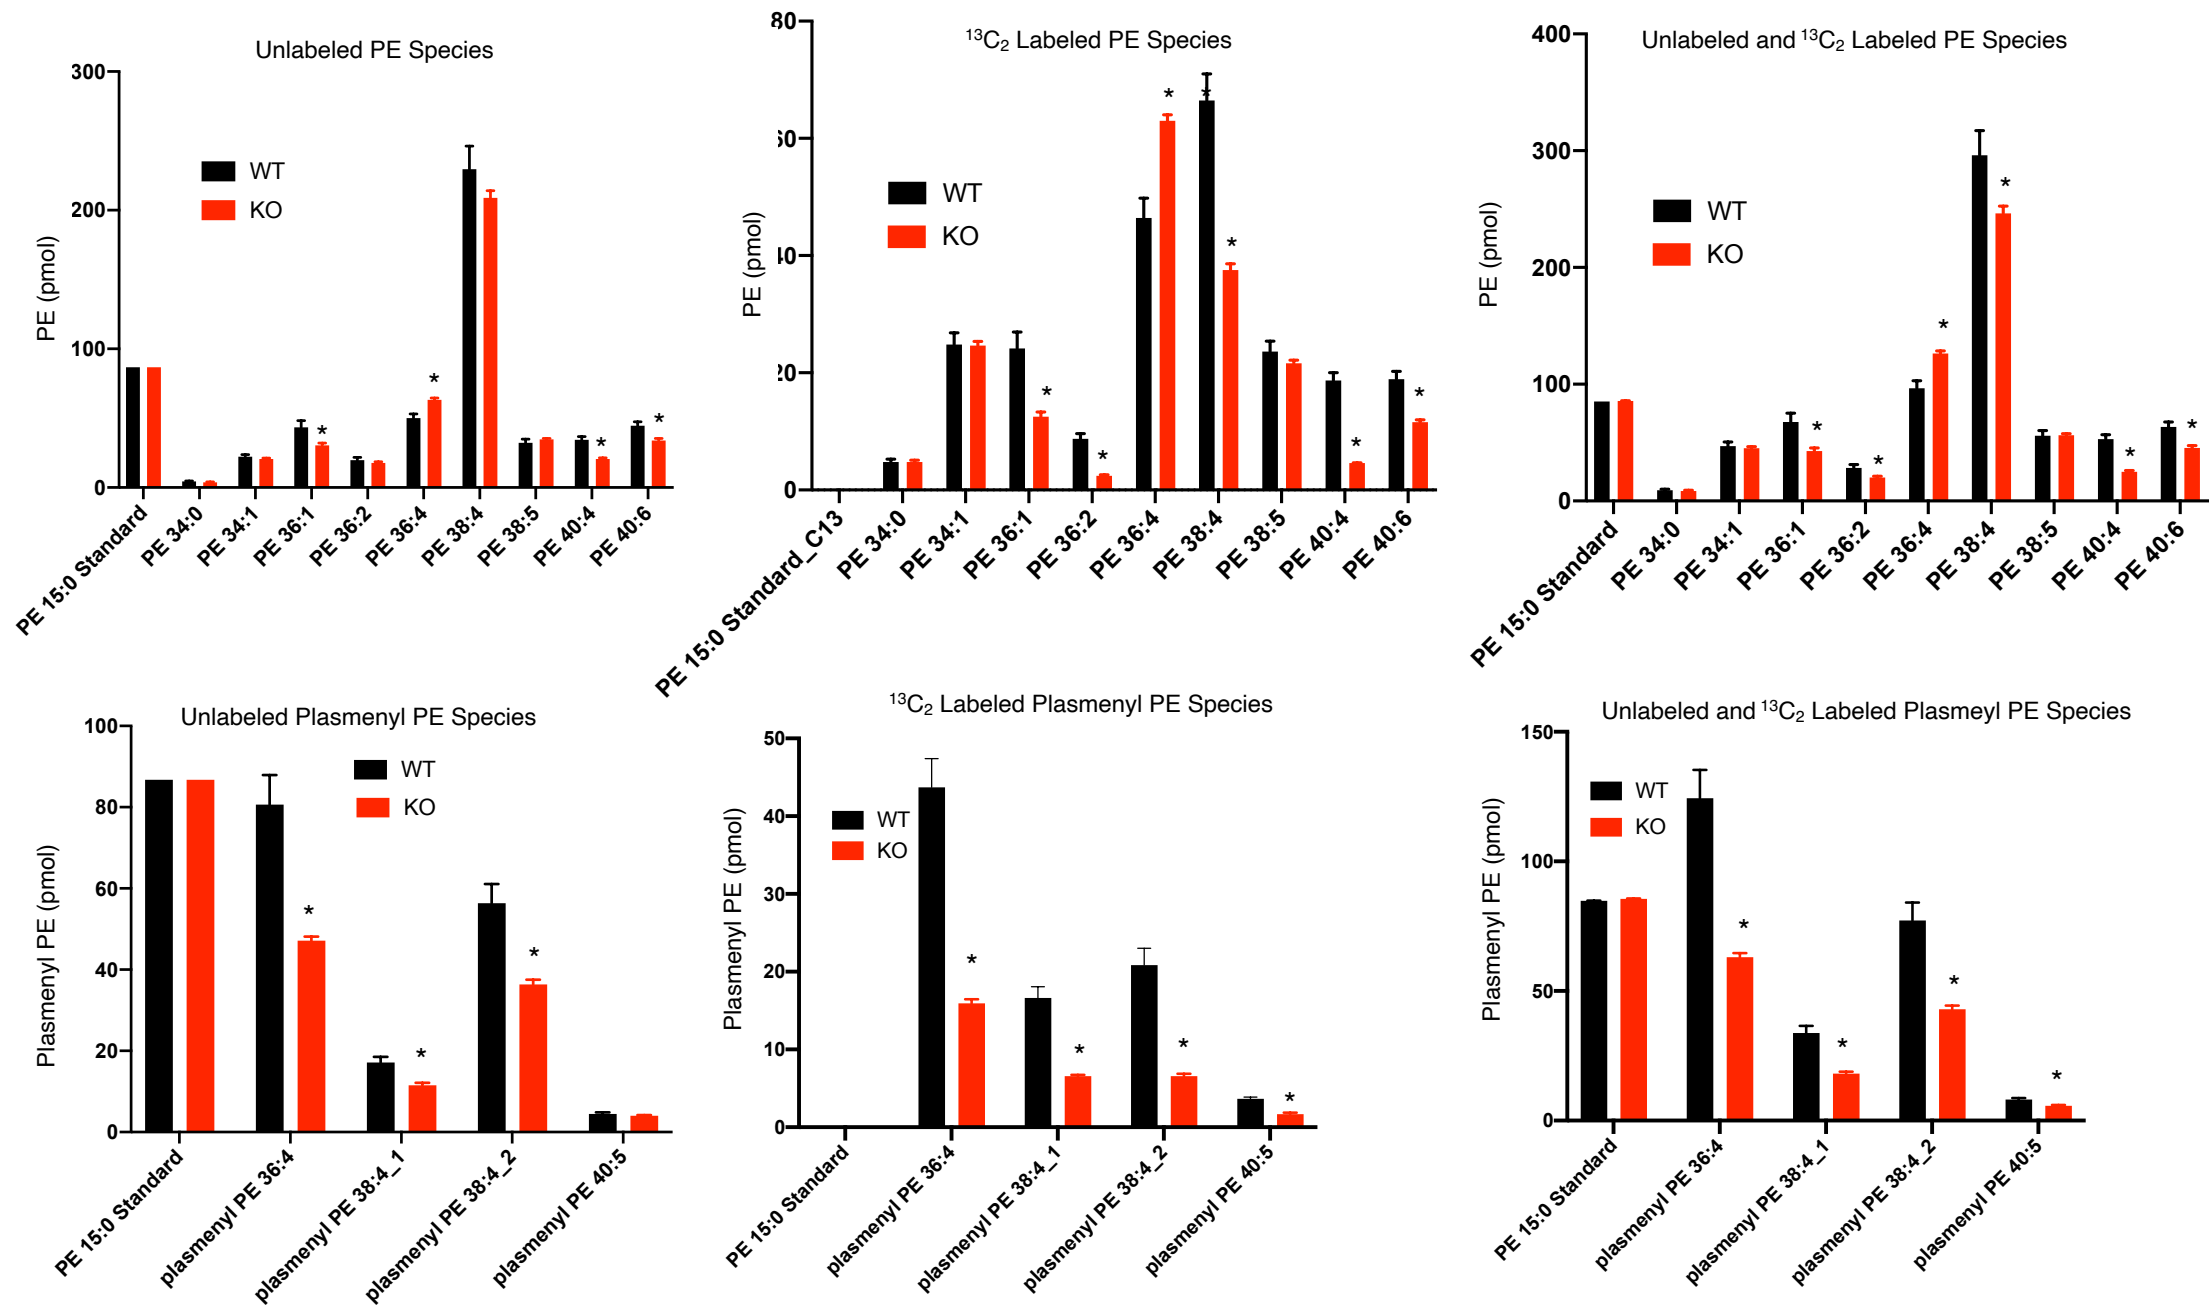

Figure S2

Supplement: mmc2.pdf [file mmc2.pdf]

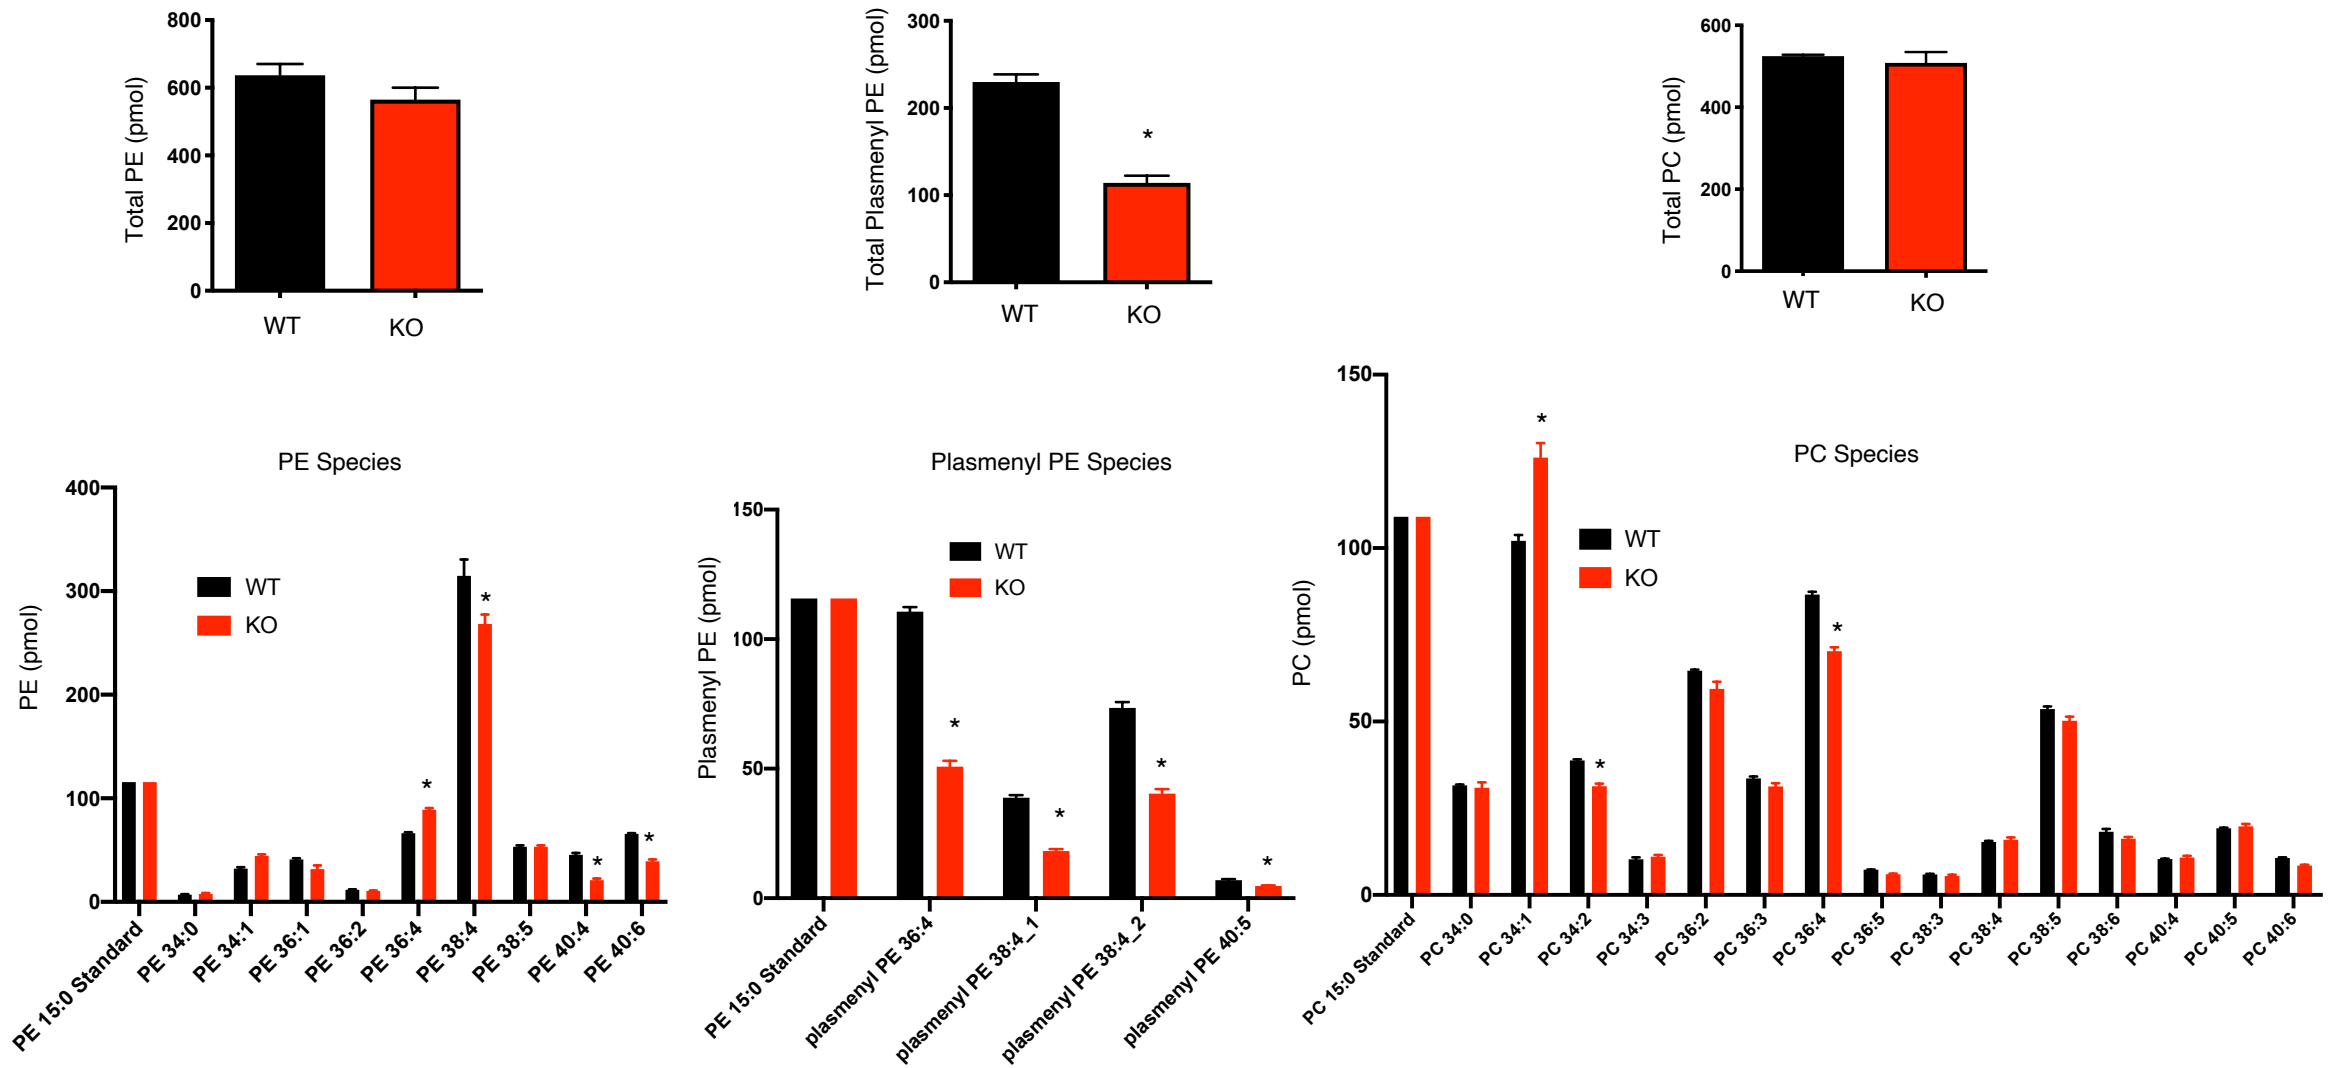

Figure S3

Supplement: mmc3.pdf [file mmc3.pdf]

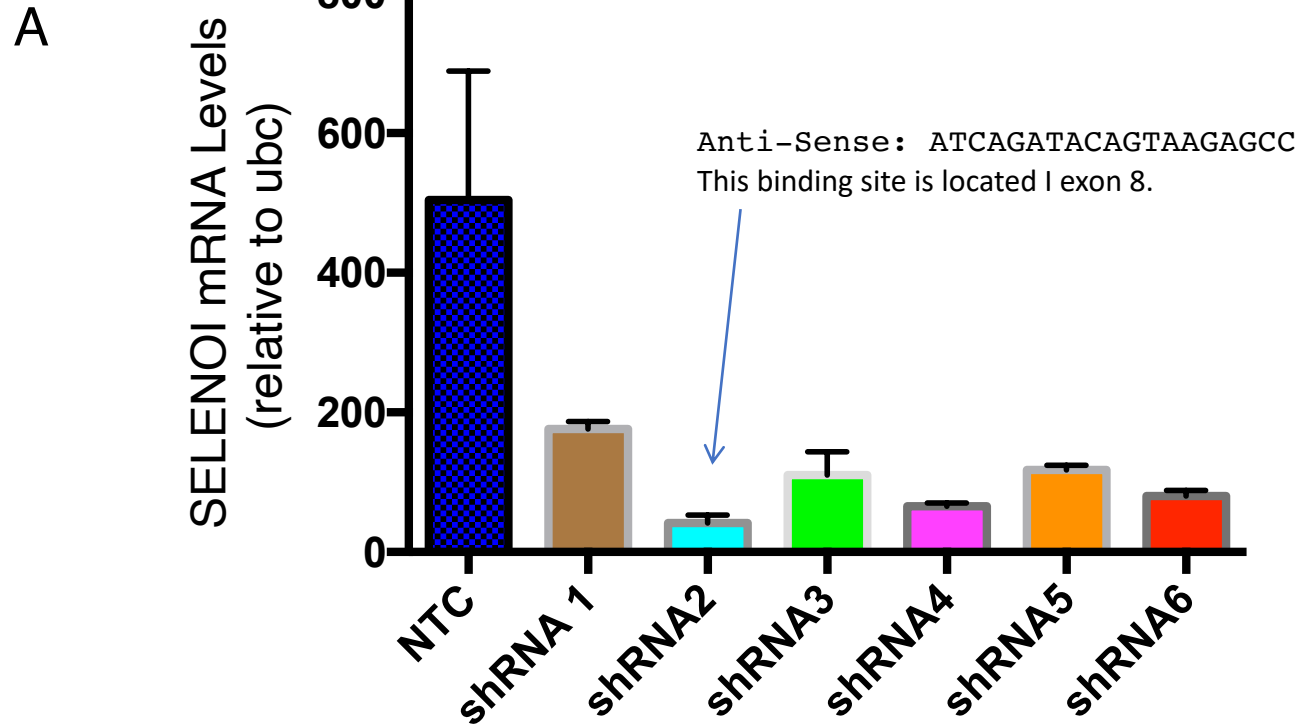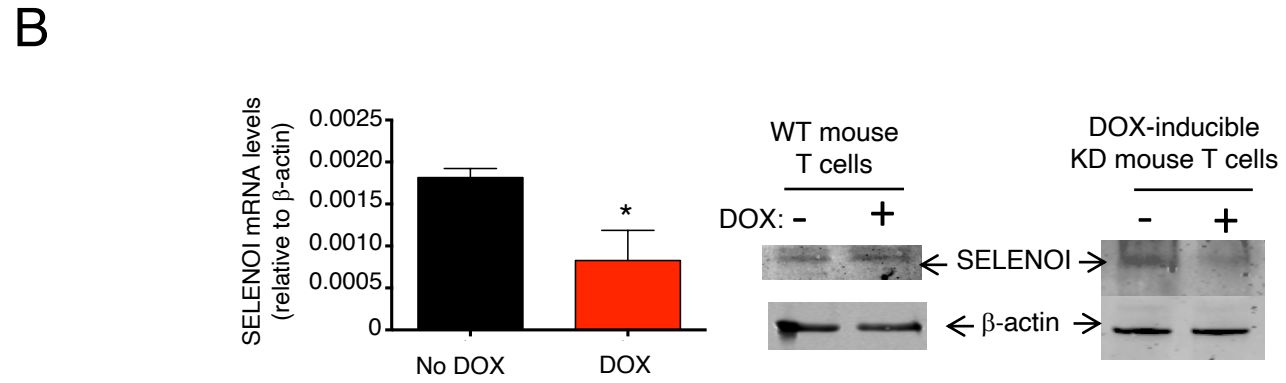

Figure S4

Supplement: mmc4.pdf [file mmc4.pdf]
